1 **Novel epigenetic-metabolic inhibitor combination treatment blocks platinum-induced ovarian**  
2 **cancer stem cell enrichment**

3 Riddhi Sood<sup>1</sup>, Sikai Xiao<sup>2</sup>, Shruthi Sriramkumar<sup>2</sup>, Christiane Hassel<sup>3</sup>, Kenneth P. Nephew<sup>2,4,5</sup>,  
4 Heather M. O'Hagan<sup>2,4,6,#</sup>

5

6 <sup>1</sup>Genome, Cell and Developmental Biology, Department of Biology, Indiana University

7 Bloomington, Bloomington, IN, 47405, USA

8 <sup>2</sup>Cell, Molecular and Cancer Biology Graduate Program and Medical Sciences Program, Indiana

9 University School of Medicine, Bloomington, IN, 47405, USA

10 <sup>3</sup>Flow Cytometry Core Facility, Department of Biology, Indiana University, Bloomington, IN

11 47405, USA

12 <sup>4</sup>Indiana University Melvin and Bren Simon Comprehensive Cancer Center, Indianapolis, IN,

13 46202, USA

14 <sup>5</sup>Department of Anatomy, Cell Biology and Physiology; Department of Obstetrics and

15 Gynecology, Indiana University School of Medicine, Indianapolis, IN, 46202, USA

16 <sup>6</sup>Department of Medical and Molecular Genetics, Indiana University School of Medicine,

17 Indianapolis, IN, 46202, USA

18 #Corresponding author. 1001 East 3<sup>rd</sup> Street, Bloomington, IN 47405. (812) 855-3035.

19 [hmohagan@indiana.edu](mailto:hmohagan@indiana.edu).

20 **Conflict of interest:** The authors declare no conflict of interest.

21 **Key words:** BRCA1, DNA hypermethylation, chemoresistance, ovarian cancer, DNA damage

22 response, NAD<sup>+</sup>, ovarian cancer stem cells, DNMT inhibitor, NAMPT

23

24 **Abstract**

25 High grade serous ovarian cancer (HGSOC) is the most common and aggressive type of ovarian  
26 cancer. Platinum resistance is a common occurrence in HGSOC and a main cause of tumor relapse  
27 resulting in high patient mortality rates. Recurrent ovarian cancer is enriched in aldehyde  
28 dehydrogenase (ALDH)+ ovarian cancer stem cells (OCSCs), which are resistant to platinum  
29 agents. We demonstrated that acute platinum treatment induced a DNA damage-dependent  
30 decrease in BRCA1 levels through *BRCA1* promoter DNA hypermethylation. In a parallel pathway  
31 associated with G2/M arrest, platinum treatment also induced an increase in expression of  
32 *NAMPT*, the rate limiting regulator of NAD<sup>+</sup> production from the salvage pathway, and NAD<sup>+</sup>  
33 levels, the cofactor required for ALDH activity. Both decreased BRCA1 and increased NAD<sup>+</sup> levels  
34 were required for the platinum-induced enrichment of OCSCs, and inhibition of both DNA  
35 methyltransferases (DNMT) and NAMPT synergistically abrogated the platinum-induced increase  
36 in OCSCs. We conclude that these two separate pathways lead to platinum-induced OCSC  
37 enrichment, providing preclinical evidence that in the neoadjuvant setting, combining DNMT and  
38 NAMPT inhibitors with platinum has the potential to reduce OC recurrence.

39

## 40 Introduction

41 Ovarian cancer (OC) is the 5<sup>th</sup> leading cause of cancer related death among women (1).  
42 High grade serous ovarian cancer (HGSOC), the most aggressive type of OC, accounts for 70-80%  
43 of all OC cases (1). The majority of OC cases are detected at an advanced stage and survival rate  
44 for patients diagnosed with stage IV disease is a dismal 17% (2). The primary therapy for the  
45 management of advanced stage OC continues to include a combination of surgery and  
46 chemotherapy and while most patients achieve a complete remission, the majority will recur and  
47 subsequently develop chemotherapy resistant disease (3).

48 We and others have shown that a subpopulation of cells called ovarian cancer stem cells  
49 (OCSCs) preferentially survive after treatment with platinum-based chemotherapeutic drugs (4),  
50 are enriched in recurrent tumors (5) and are at least partially responsible for chemotherapy  
51 resistance (6). Several markers have been used to identify OCSCs, including the activity of  
52 aldehyde dehydrogenase (ALDH) enzymes. ALDH1 is overexpressed in OCSCs and *ALDH1*  
53 expression correlates with worse OC survival and platinum resistance (4, 7). ALDH<sup>+</sup> cells have  
54 tumor initiating capacity, form spheroids in non-adherent conditions, and express stem cell  
55 markers (4, 8), all criteria of functional CSCs.

56 Standard of care platinum-based chemotherapeutic drugs (cisplatin, carboplatin) cause  
57 DNA damage in the form of platinum-DNA adducts (9), which activate the DNA damage response  
58 (DDR). The DDR can result in DNA repair, cell cycle arrest, and/or apoptosis (10, 11). Altered DDR  
59 is thought to contribute to the ability of OCSCs to survive chemotherapy. For example, OCSCs  
60 have higher levels of DDR pathway activation through phosphorylation of DDR factors like ataxia  
61 telangiectasia mutated (ATM), checkpoint kinase 1 (CHK1) and CHK2 (12). The tumor suppressor

62 breast cancer 1 (*BRCA1*) plays an important role in regulating the DDR through interaction of its  
63 various functional domains with proteins required for cell cycle regulation, tumor suppression,  
64 and DNA repair (13-16). About 40% of women with a family history of OC have *BRCA1/2* mutation  
65 or promoter hypermethylation (2).

66 Tumors with *BRCA1* mutation frequently undergo locus-specific loss of heterozygosity  
67 (LOH), resulting in loss of the wildtype copy of *BRCA1* and subsequent increased sensitivity to  
68 chemotherapy due to defective homologous recombination DNA repair (17). Patients with *BRCA1*  
69 mutant tumors without locus-specific LOH have significantly lower percentage of survival  
70 compared to patients with *BRCA1* mutation with locus-specific LOH (17), indicating partial loss of  
71 *BRCA1* functions as a secondary mode of resistance to chemotherapy. Furthermore, as survival  
72 rates of patients with *BRCA1* promoter DNA hypermethylation were lower compared to patients  
73 with *BRCA1* mutation (18), and the fact the vast majority of HGSOC have a wildtype *BRCA1* (2), a  
74 better understanding of the role of wildtype *BRCA1* in response to platinum agents is of critical  
75 importance.

76 The metabolite nicotinamide adenine dinucleotide ( $\text{NAD}^+$ ) plays a key role in major  
77 metabolic pathways including glycolysis, tricarboxylic acid (TCA) cycle, and oxidative  
78 phosphorylation (19). Furthermore,  $\text{NAD}^+$  is a co-factor for ALDH enzymes and essential for the  
79 ALDH-mediated conversion of aldehydes to carboxylic acids (20, 21). Ovarian tumors with  
80 reduced expression of *BRCA1* through *BRCA1* promoter DNA hypermethylation or mutation have  
81 increased levels of  $\text{NAD}^+$  and expression of nicotinamide phosphoribosyltransferase (NAMPT), the  
82 rate limiting regulator of  $\text{NAD}^+$  synthesis from the salvage pathway (22). Furthermore, NAMPT  
83 has been shown to promote platinum-induced senescence-associated OCSCs (23). Therefore,

84 studying the role of metabolites in the response to platinum treatment is important to  
85 understand how chemoresistance develops.

86 With OCSCs known involvement in chemoresistance and tumor reoccurrence, we sought  
87 to mechanistically study how platinum treatment induces OCSC enrichment and develop  
88 strategies to combat this enrichment. We demonstrate that two separate pathways drive  
89 platinum-induced OCSC enrichment, one involving epigenetic-mediated silencing of *BRCA1* and  
90 the other altered energy metabolism. Cisplatin treatment resulted in a DDR-dependent decrease  
91 in *BRCA1* expression through *BRCA1* promoter DNA hypermethylation as well as a G2/M cell cycle  
92 arrest-related increase in *NAMPT* expression and subsequent increase in cellular  $\text{NAD}^+$  levels.  
93 Importantly, combined treatment with a DNA methyltransferase (DNMT) and a NAMPT inhibitor  
94 synergistically abrogated the cisplatin-induced OCSC enrichment. Our findings support using a  
95 novel epigenetic-metabolic inhibitor combination in the neoadjuvant setting to reduce the  
96 platinum-induced enrichment of OCSCs and avert the development of platinum resistance in OC.

97

## 98 **Results**

### 99 **Cisplatin treatment enriches for ALDH+ cells**

100 Advanced stage OC patients frequently have residual tumor cells following  
101 chemotherapy. To determine whether OCSCs are enriched by platinum chemotherapy, we  
102 treated HGSOC cell lines OVCAR5, OVSAHO and OVCAR3 with corresponding  $\text{IC}_{50}$  doses of  
103 cisplatin (24) and analyzed the percentage of ALDH+ (%ALDH+) cells using the ALDEFLUOR assay  
104 (4). To investigate acute effects, we first conducted a time course study in OVCAR5 cells (3 to 16  
105 h). The %ALDH+ cells significantly increased after treatment with cisplatin for 8 h and 16 h (Fig.

106 1A, Supplementary Fig. S1A). Similarly, cisplatin treatment for 16 h increased the %ALDH+ cells  
107 in OVSAHO (5.8% to 10.8%) and OVCAR3 (20% to 28%) cell lines (Fig. 1A). PEO1, a *BRCA2* mutant  
108 OC cell line (25), had lower initial levels of %ALDH+ cells and a smaller but significant cisplatin-  
109 induced increase in %ALDH+ cells at 16 h (Supplementary Fig. S1B). However, in the *BRCA1*  
110 mutant COV362 (26) cell line, no increase in %ALDH+ cells after acute cisplatin treatment was  
111 observed (Supplementary Fig. S1B). To confirm that the increase in %ALDH+ cells was associated  
112 with a stemness phenotype, we tested the ability of platinum-treated OVCAR5 and OVSAHO cells  
113 to form spheroids in anchorage independent conditions. When cells were plated in stem cell  
114 media, cisplatin pretreated cells were more spheroid-like compared to UT (Fig. 1B). Using a cell  
115 viability assay based on intracellular esterase activity, there were significantly more viable cells  
116 in the spheroids generated from cells pretreated with cisplatin than from UT cells (Fig. 1B).

117         Isotypes of ALDH1 - *ALDH1A1*, *ALDH1A2* and *ALDH1A3* are linked to stemness of OC cells  
118 (27). Depending on the tumor type and cell line, different isozymes of ALDH1 are overexpressed  
119 – *ALDH1A3* in OVCAR5 and *ALDH1A1* in OVSAHO (Supplementary Fig. S1C). We hypothesized that  
120 cisplatin may induce enrichment of ALDH+ cells by altering ALDH expression. However, no change  
121 in expression of *ALDH1A1/A2/A3* isoforms after treatment with cisplatin was observed in  
122 OVCAR5 cells (Supplementary Fig. S1C). In OVSAHO cells, no change in expression of the major  
123 ALDH1 isoform in these cells, *ALDH1A1*, was observed after cisplatin treatment, although  
124 *ALDH1A2* and *ALDH1A3* isoforms significantly decreased and increased, respectively, after  
125 cisplatin treatment (Supplementary Fig. S1C). Because *ALDH1A1* is expressed approximately 100-  
126 fold more than *ALDH1A3*, *ALDH1A1* likely contributes to the majority of ALDH activity in this cell  
127 line suggesting the change in *ALDH1A3* expression has no detectable effect on ALDH activity.

128 Additionally, even though cisplatin caused the expected increase in the DNA damage marker  
129 phosphorylated histone 2AX ( $\gamma$ H2AX) over a cisplatin time course, there was no significant change  
130 in ALDH1 protein levels in OVCAR5 cells (Supplementary Fig. 1D).

131 BRCA1 is known to play a role in OC (2) and the DDR (13-16). As BRCA1 levels have been  
132 linked to an interstrand crosslink (ICL)-dependent increase in stemness (28), we assayed BRCA1  
133 expression following cisplatin treatment. *BRCA1* RNA expression levels in OVCAR5, OVSAHO and  
134 *BRCA2*-mutant PEO1 significantly decreased by 16 h after cisplatin treatment (Fig. 1C).  
135 Furthermore, BRCA1 protein levels correspondingly decreased and correlated with increased  
136  $\gamma$ H2AX levels in cisplatin treated cells (Fig. 1D). Taken together, these data suggest that acute  
137 cisplatin treatment enriched for ALDH+ cells with stemness properties and decreased *BRCA1*  
138 levels. The minimal change in ALDH1 level after cisplatin treatment further suggested that  
139 another mechanism contributes to the cisplatin-induced enrichment of ALDH+ cells.

140

141 **The cisplatin-induced decrease in *BRCA1* levels is associated with *BRCA1* promoter DNA**  
142 **hypermethylation**

143 *BRCA1* expression is regulated through different mechanisms, including promoter DNA  
144 hypermethylation-associated gene silencing (29). Corresponding to the platinum-induced  
145 decrease in *BRCA1* expression, there was a significant increase in *BRCA1* promoter DNA  
146 methylation after 3 h, 8 h and 16 h cisplatin treatment as assayed by quantitative methylation-  
147 specific PCR (qMSP) in OVCAR5 and OVSAHO cells (Fig. 2A). Bisulfite sequencing of 12 CpG sites  
148 within the *BRCA1* promoter region confirmed the increase in methylated CpGs after 16 h cisplatin  
149 treatment compared to untreated (UT) cells (Fig. 2B). Total methylation percentage calculated

150 using the bisulfite sequencing data further demonstrated an increase in *BRCA1* promoter DNA  
151 methylation after cisplatin treatment (Fig. 2C).

152 DNA methylation is catalyzed by DNMTs. DNMT1 is predominantly a maintenance DNA  
153 methyltransferase whereas DNMT3B and DNMT3A are predominantly *de novo* DNMTs (30).  
154 Cisplatin treatment increased the levels of DNMT1 and DNMT3B protein (Fig. 2D), corresponding  
155 to the timing of the *BRCA1* promoter hypermethylation and increase in the DNA damage marker  
156  $\gamma$ H2AX (Fig. 2D). Altogether this data demonstrates that the cisplatin-induced decrease in *BRCA1*  
157 expression is associated with promoter DNA hypermethylation.

158

### 159 **The cisplatin-induced decrease in *BRCA1* is essential for the associated increase in %ALDH+ cells**

160 To determine if a decrease in *BRCA1* expression is sufficient to increase the %ALDH+ cells,  
161 we altered *BRCA1* levels by using stable shRNA mediated knockdown (KD) in OVCAR5 cells. *BRCA1*  
162 KD using two different shRNAs reduced *BRCA1* expression compared to empty vector (EV) shRNA  
163 cells to level similar to EV cells treated with cisplatin (Fig. 3A). Additionally, *BRCA1* protein levels  
164 decreased after *BRCA1* KD compared to EV to a level similar to EV cells treated with cisplatin (Fig.  
165 3B). *BRCA1* shRNA1 KD cells had similar baseline %ALDH+ cells compared to EV (Fig. 3C). The  
166 slight increase in %ALDH+ cells in *BRCA1* shRNA2 KD compared to EV cells was significantly less  
167 than the cisplatin-induced increase in EV cells.

168 Because the effect of altering *BRCA1* levels on the %ALDH+ cells was limited, we  
169 hypothesized that DNA damage caused by cisplatin is important to induce an increase in %ALDH+  
170 cells. ATM, one of the first proteins to be recruited to DNA damage sites (31), is responsible for  
171 phosphorylation of downstream targets like H2AX and the activation of downstream DNA repair



172 pathways (32). Inhibiting ATM (ATMi) using KU-55933 (30) reduced cisplatin-induced levels of  
173 active, phosphorylated ATM in OVCAR5 and OVSAHO cells (Supplementary Fig. S2A). Consistent  
174 with our previous results (Fig. 1C), *BRCA1* levels decreased after cisplatin only treatment (Fig.  
175 3D). *BRCA1* expression after treatment with ATMi only was similar to DMSO treated in both cell  
176 lines (Fig. 3D). ATMi and cisplatin dual treatment prevented the cisplatin-induced decrease in  
177 *BRCA1* expression, with *BRCA1* levels being similar to DMSO treated cells in both cell lines.  
178 Consistent with the association between decreased *BRCA1* levels and increased %ALDH+ cells,  
179 combining ATMi with cisplatin treatment prevented the cisplatin-induced increase in %ALDH+  
180 cells compared to cisplatin treatment only in both cell lines (Fig. 3E). ATMi treatment itself did  
181 not alter the %ALDH+ cells in OVCAR5 cells but decreased the %ALDH+ cells compared to DMSO  
182 treated cells in OVSAHO cells (Fig. 3E).

183         Next, we transiently transfected cells with a plasmid that drives expression of *BRCA1* using  
184 an exogenous promoter lacking the normal *BRCA1* regulatory regions, including the promoter  
185 CpG island (CpGi-null *BRCA1*; Supplementary Fig. 2B). Cells transfected with CpGi-null *BRCA1* had  
186 higher levels of *BRCA1* expression when compared to UT EV transfected cells in OVCAR5 and  
187 OVSAHO cells (Fig. 3F). Cisplatin treatment decreased *BRCA1* expression in CpGi-null *BRCA1*  
188 transfected OVSAHO cells but not in OVCAR5 cells compared to UT CpGi-null *BRCA1* transfected  
189 cells but *BRCA1* levels remained higher than EV cells treated with or without cisplatin in both cell  
190 lines (Fig. 3F). Similarly, *BRCA1* protein levels were higher in UT CpGi-null *BRCA1* transfected  
191 OVCAR5 cells compared to UT EV transfected cells (Fig. 3G). *BRCA1* protein levels decreased in  
192 cisplatin-treated CpGi-null *BRCA1* transfected cells compared to UT CpGi-null *BRCA1* and UT EV  
193 transfected cells but remained higher than cisplatin treated EV transfected cells (Fig. 3G). As

194 expected,  $\gamma$ H2AX levels increased in cells treated with cisplatin with EV or CpGi-null BRCA1  
195 transfection (Fig. 3G).

196 To determine how maintaining BRCA1 levels effects platinum-induced OCSC enrichment,  
197 the ALDFLUOR assay was performed in UT and cisplatin-treated EV and CpGi-null BRCA1  
198 transfected cells. UT CpGi-null BRCA1 transfected cells had similar baseline %ALDH+ cells as UT  
199 EV transfected cells in both OVCAR5 and OVSAHO cells (Fig. 3H). Importantly, even though  
200 cisplatin increased the %ALDH+ cells in EV cells as expected, there was no increase in %ALDH+  
201 cells after cisplatin treatment in CpGi-null BRCA1 transfected cells in both cell lines. Collectively,  
202 these data demonstrate that the effect of altering BRCA1 levels without DNA damage on %ALDH+  
203 cells is limited, maintaining BRCA1 expression prevents the platinum-induced increase in %ALDH+  
204 cells and the cisplatin-induced decrease in BRCA1 levels below the level in EV cells contributes to  
205 the cisplatin-induced increase in %ALDH+ cells.

206

### 207 **Decitabine treatment abrogates the cisplatin-induced increase in %ALDH+ cells**

208 DNA hypomethylating agents like decitabine (DAC) have been shown to re-sensitize  
209 platinum-resistant OC cells to platinum (33). Here, we used low dose DAC to determine the role  
210 of DNA methylation in the cisplatin-induced changes observed above. Bisulfite sequencing of 12  
211 CpG sites within the *BRCA1* promoter after DAC only and DAC +cisplatin dual treatment  
212 confirmed that DAC treatment prevented the *BRCA1* promoter DNA hypermethylation caused by  
213 cisplatin treatment alone (Supplementary Fig. S3, Fig. 4A). Corresponding to DAC blocking  
214 platinum-induced *BRCA1* DNA hypermethylation (Fig. 2), dual treatment with DAC and cisplatin  
215 resulted in significantly higher *BRCA1* expression levels than cisplatin treatment alone in both

216 OVCAR5 and OVSAHO cells, maintaining *BRCA1* levels at or above those in UT cells (Fig. 4B). With  
217 cisplatin treatment only, *BRCA1* protein levels decreased (Fig. 4C; consistent with Fig. 1D).  
218 Importantly, *BRCA1* protein levels were maintained after dual treatment of DAC and cisplatin to  
219 similar levels as UT cells (Fig. 4C). Unexpectedly, DAC treatment alone resulted in increased  
220 *BRCA1* expression and protein levels when compared to UT (Fig. 4B, C), suggesting that additional  
221 CpGs may be methylated at baseline in the *BRCA1* promoter than those interrogated or an  
222 indirect mechanism of DAC regulation of *BRCA1* levels. Consistent with DNMT protein  
223 degradation in response to DAC treatment (34), DNMT1 and DNMT3B protein levels decreased  
224 in DAC treated cells with or without cisplatin treatment (Fig. 4C) and regardless of DAC treatment,  
225  $\gamma$ H2AX levels in cells treated with cisplatin increased as expected (Fig. 4C).

226         Next, the effect of low dose DAC on cisplatin-induced enrichment of OCSCs was  
227 determined. OVCAR5 cells treated with DAC had similar baseline %ALDH+ cells as UT while  
228 OVSAHO cells had significantly lower %ALDH+ cells than UT (Fig. 4D). As expected, cisplatin  
229 treatment increased in %ALDH+ cells in both cell lines and dual treatment with DAC and cisplatin  
230 blocked the cisplatin-induced increase in %ALDH+ cells with the %ALDH+ cells after dual  
231 treatment being similar to UT and/or DAC only treated cells (Fig. 4D).

232         To determine the role of low dose DAC and cisplatin dual treatment on OCSC survival, we  
233 examined the ability of pretreated cells to grow as spheroids in stem cell media. OVCAR5 and  
234 OVSAHO cells pretreated with cisplatin alone generated spheroids with increased viability  
235 compared to non-pretreated cells (4E; consistent with Fig. 1B). Spheroids derived from DAC  
236 pretreated only cells had similar viability as spheroids generated from non-pretreated cells (Fig.  
237 4E). Dual pretreatment of DAC and cisplatin abrogated the cisplatin-induced spheroid formation

238 and increase in viable cells. Altogether, these data demonstrate that low dose DAC treatment  
239 can prevent the platinum-induced enrichment of OCSCs, likely by maintaining BRCA1 expression.

240

#### 241 **G2/M cell cycle arrest results in an increase %ALDH+ cells**

242 Because platinum induces cell cycle arrest (35), we studied if cell cycle arrest is related to  
243 the cisplatin-induced enrichment of OCSCs. In UT OVCAR5 and OVSAHO cells, a higher percentage  
244 of ALDH+ cells were in the G2/M phase of the cell cycle than ALDH- cells (OVCAR5: ALDH- = 4.4%,  
245 ALDH+ = 15.3%, OVSAHO: ALDH - = 11.6%, ALDH+ = 34%) (Fig. 5A, Supplementary Fig. 4A). This  
246 data is consistent with a prior study demonstrating a higher proportion of ALDH+ cells in G2/M  
247 than ALDH- cells in other OC cell lines (35). Additionally, after treatment with cisplatin, there was  
248 an expected increase in total cells in G2/M for both OVCAR5 ALDH- and ALDH+ cells (Fig. 5B;  
249 ALDH+, 25.6% to 30.3%; ALDH-, 10.3% to 27.3%).

250 To determine if G2/M arrest is important for the cisplatin-induced increase in %ALDH+  
251 cells (Fig. 1A), we induced G2/M arrest independent of platinum treatment through cyclin-  
252 dependent kinase 1 inhibition (CDK1i) with the CDK inhibitor RO-3306 (36). CDK1 is a master  
253 regulator of the cellular transition from G2 to M phase (37). CDK1i treatment increased the  
254 percentage of cells in the G2/M phase of the cell cycle as compared UT and DMSO treatment to  
255 a level that was similar to or higher than levels after cisplatin treatment in OVSAHO and OVCAR5  
256 cells, respectively (Fig. 5C). Comparably to cisplatin, CDK1i treatment resulted in a significant  
257 increase in %ALDH+ cells compared to UT in both cell lines (Fig. 5D). As a control for CDK1i  
258 treatment, we determined total cells positive for phosphorylated Ser10 H3, a marker of active  
259 mitosis. Compared to UT cells, there was a decrease in cells positive for phosphorylated Ser10

260 H3 after cisplatin and CDK1i treatments (UT: 2%, DMSO: 2.3%, cisplatin: 0.3% and CDK1i: 0.1%;  
261 Supplementary Fig. S4B); indicating G2/M arrest after cisplatin or CDK1i treatment, as expected.  
262 Additionally, unlike cisplatin treatment, CDK1i treatment did not induce DNA damage compared  
263 to UT as measured by  $\gamma$ H2AX levels in OVCAR5 and OVSAHO cells (Supplementary Fig S4C), further  
264 supporting that G2/M arrest contributes to the cisplatin-induced increase in %ALDH+ cells.

265

### 266 **NAMPT inhibition abrogates cisplatin-induced enrichment of ALDH+ cells**

267 A key co-factor of ALDH activity is NAD<sup>+</sup> (38), and increased levels of NAD<sup>+</sup> and its rate-  
268 limiting regulator, NAMPT, have been shown to promote cancer cell survival and were associated  
269 with chemo-resistance and low patient survival (19, 39). Increased NAD<sup>+</sup> levels were also  
270 reported to drive a platinum-induced increase in senescence-associated OCSCs (23). We  
271 observed that NAD<sup>+</sup> levels were significantly higher in cells after 16 h of cisplatin treatment than  
272 in UT cells (Fig. 6A). In addition, *NAMPT* expression levels increased after 16 h acute cisplatin  
273 treatment suggesting that the cisplatin-induced increase in NAD<sup>+</sup> levels was due to a cisplatin-  
274 induced increase in *NAMPT* expression (Fig. 6B). Because the increase in *NAMPT* expression was  
275 highest after 16h cisplatin treatment, we determined *NAMPT* expression in OVSAHO, PEO1 and  
276 COV362 cell lines at this time point and observed similar cisplatin-induced increases in *NAMPT*  
277 expression (Fig. 6B and Supplementary Fig. S5). To determine if blocking the cisplatin-induced  
278 increase in NAD<sup>+</sup> prevented the increase in %ALDH+ cells, we treated cells with the NAMPT  
279 inhibitor- STF-118804 (NAMPTi), which has been shown to reduce cell viability in solid tumors  
280 (40). After cisplatin treatment with or without DMSO, NAD<sup>+</sup> levels increased compared to UT (Fig.  
281 6C; consistent with Fig. 6A); furthermore, dual treatment with NAMPTi and cisplatin prevented

282 the cisplatin-induced increase in NAD<sup>+</sup> levels when compared to cisplatin treatment with or  
283 without DMSO and were similar to control levels or NAMPTi only (Fig. 6C).

284 Next, we examined the effect of dual treatment with NAMPTi and cisplatin on the  
285 cisplatin-induced increase in %ALDH<sup>+</sup> cells. OVCAR5 cells treated with NAMPTi had decreased  
286 %ALDH<sup>+</sup> cells relative to UT and DMSO treated cells, while OVSAHO NAMPTi treated cells had  
287 similar %ALDH<sup>+</sup> cells as UT and DMSO treated cells (Fig. 6D). As expected, there was a significant  
288 increase in %ALDH<sup>+</sup> cells after cisplatin treatment when compared to UT or DMSO treated cells  
289 in both cell lines. In contrast, dual treatment of NAMPTi and cisplatin prevented the cisplatin-  
290 induced increase in %ALDH<sup>+</sup> cells, with the %ALDH<sup>+</sup> cells in the dual treated samples being  
291 decreased or similar to levels in UT and DMSO treated cells in OVCAR5 and OVSAHO cells,  
292 respectively. Further, the effect of NAMPT inhibition on cisplatin-induced enrichment of OCSCs  
293 was investigated based on the ability of pretreated cells to grow as spheroids in stem cell media.  
294 As expected, cisplatin +DMSO pretreated cells were more spheroid like than UT and DMSO  
295 pretreated OVCAR5 cells (Fig. 6E, consistent with Fig. 1B). Spheroids viability after NAMPTi  
296 pretreatment was higher than DMSO pretreated cells but lower compared to cisplatin pretreated  
297 cells, and dual pretreatment with NAMPTi and cisplatin abrogated the cisplatin-induced spheroid  
298 formation and increase in viable cells (Fig. 6E). Additionally, dual pretreated cells had similar or  
299 lower viability as spheroids generated from DMSO or NAMPTi pretreated cells, respectively.  
300 These data demonstrate that cisplatin induced an increase in NAD<sup>+</sup> levels through increased  
301 expression of the rate-limiting enzyme, *NAMPT*, and NAMPT inhibition abrogated the cisplatin-  
302 induced enrichment of ALDH<sup>+</sup> cells.

303

304 **Cisplatin treatment induces two separate pathways to increase %ALDH+ cells**

305 To further explore how decreased *BRCA1* expression, increased NAD<sup>+</sup> levels and G2/M  
306 arrest are interconnected during cisplatin-induced OCSC enrichment, we assayed *BRCA1* and  
307 *NAMPT* expression after CDK1 inhibition, *BRCA1* overexpression and DAC treatment. In contrast  
308 to the cisplatin-induced decrease in *BRCA1* expression (Fig. 1C), *BRCA1* expression levels  
309 increased after CDK1i treatment in OVCAR5 and OVSAHO cells relative to UT and/or DMSO  
310 treated cells (Fig. 7A). However, consistent with the cisplatin treatment data, *NAMPT* RNA  
311 expression levels increased after CDK1i treatment in both cell lines compared to UT and/or DMSO  
312 treated cells (Fig. 7B). The level of *NAMPT* expression was higher in CDK1i compared to cisplatin  
313 treated OVSAHO cells (Fig. 7B).

314 These data suggest that G2/M cell cycle arrest and *NAMPT* expression but not *BRCA1*  
315 expression are connected, and to further confirm this relationship, we assayed *NAMPT*  
316 expression and NAD<sup>+</sup> levels in CpGi-null *BRCA1* transfected cells, which we had previously  
317 demonstrated did not undergo cisplatin-induced enrichment of OCSC due to sustained *BRCA1*  
318 expression (Fig. 3H). In EV and CpGi-null *BRCA1* transfected OVCAR5 cells, *NAMPT* expression was  
319 elevated to a similar level relative to non-transfected UT cells and no further increase in *NAMPT*  
320 expression in transfected cells was observed after cisplatin treatment (Fig. 7C) even though,  
321 consistent with our previous results (Fig. 5B), cisplatin treatment increased *NAMPT* expression in  
322 non-transfected OVCAR5 cells. However, in OVSAHO cells, cisplatin treatment increased *NAMPT*  
323 expression in both EV and CpGi-null *BRCA1* transfected cells compared to the UT transfected  
324 controls (Fig. 7C). In the absence of cisplatin treatment, *NAMPT* expression was similar in EV or  
325 CpGi-null *BRCA1* transfected OVSAHO cells. Furthermore, CpGi-null *BRCA1* transfected cells had

326 similar baseline NAD<sup>+</sup> levels as EV and non-transfected OVCAR5 cells (Fig. 7D) and NAD<sup>+</sup> levels  
327 increased after cisplatin treatment in non-transfected cells (Fig. 7D), as expected. Cisplatin  
328 treatment still increased NAD<sup>+</sup> levels in EV and CpGi-null BRCA1 transfected cells compared to UT  
329 controls although to a lesser extent than in non-transfected cells (Fig. 7D). This data suggests that  
330 even though maintaining BRCA1 expression blocks the cisplatin-induced increase in %ALDH+  
331 cells, cisplatin treatment still increases NAD<sup>+</sup> levels.

332 BRCA1 overexpression has been previously connected to an increase of cells in the G2/M  
333 phase of the cell cycle (41). So, it was of interest to determine if changes in the cell cycle were  
334 driving the effect on platinum-induced OCSC enrichment when *BRCA1* expression was  
335 maintained by either CpGi-null transfection or DAC treatment. UT CpGi-null BRCA1 transfected  
336 cells had a higher percentage of cells in G2/M phase of the cell cycle when compared to UT non-  
337 transfected or EV transfected OVCAR5 cells (Supplementary Fig. 6). Cisplatin treatment of CpGi-  
338 null BRCA1 transfected cells increased total cells in G2/M phase of the cell cycle compared to  
339 cisplatin treated non-transfected cells and EV transfected cells as well as all types of UT cells. EV  
340 transfected cells treated with or without cisplatin had higher percentage of cells in G2/M phase  
341 of the cell cycle compared to UT non-transfected cells controls, which may explain the elevated  
342 *NAMPT* expression in these cells (Fig. 7C). Even though DAC treatment blocked the platinum-  
343 induced decrease in *BRCA1* expression (Fig. 4A) and increase in %ALDH+ cells (Fig. 4C), DAC  
344 treatment alone or in combination with cisplatin still elevated *NAMPT* expression compared to  
345 UT, and the level was similar to (or higher) than cells treated with cisplatin (Fig. 7E). Altogether,  
346 these data indicate that G2/M cell cycle arrest and the associated change in *NAMPT* expression  
347 were required for platinum-induced OCSC enrichment independently of decreased *BRCA1*



348 expression. Furthermore, our previous ATMi data indicated that DNA damage and/or the DDR  
349 were required for the platinum-induced decrease in *BRCA1* expression and are separate from cell  
350 cycle related changes in *NAMPT* expression.

351

### 352 **Dual DNMTi and NAMPTi treatment abrogate the cisplatin-induced increase in %ALDH+ cells**

353 The above observations indicated that both the cisplatin-induced decrease in *BRCA1*  
354 levels and increase in *NAMPT* expression and  $\text{NAD}^+$  levels were required for the platinum-induced  
355 increase in %ALDH+ cells. Thus, two pathways contributed to the cisplatin-induced enrichment  
356 of OCSCs, namely the DDR-linked decrease in *BRCA1* expression and the cell cycle-linked increase  
357 in *NAMPT* expression and  $\text{NAD}^+$  levels. Although inhibiting either pathway alone with low  
358 concentrations of DAC (Fig. 4) or NAMPTi (Fig. 6) abrogated the cisplatin-induced enrichment of  
359 OCSC, we hypothesized that combining very low dose treatment of the two inhibitors would  
360 impact both pathways and further abrogate the cisplatin-induced increase in %ALDH+ cells.

361 First, several concentrations of DAC and NAMPTi were used alone to determine doses of  
362 each that had minimal to no effect on the cisplatin-induced increase in %ALDH+ cells (NAMPTi -  
363 12.5 nM; DAC - 10 nM and 20 nM; Supplementary Fig. S7A, B). Then, we sought to determine if  
364 combining selected lower doses of each drug would prevent the cisplatin-induced increase in  
365 %ADLH+ cells. As expected, cells treated with individual very low dose DAC and low dose NAMPTi  
366 in combination with cisplatin had similar increases in %ALDH+ cells as cells treated with cisplatin  
367 alone in OVCAR5 and OVSAHO cells (Fig. 8A). Importantly, combination treatment of very low  
368 dose DAC with low dose NAMPTi and cisplatin prevented the cisplatin-induced increase in  
369 %ALDH+ cells and resulted in similar %ALDH+ cells as DMSO treated cells in both cell lines.

370 Furthermore, using Compusyn software (42) that uses combination index theorem, treatment of  
371 very low dose DAC (10 nM and 20 nM) with low dose NAMPTi and cisplatin synergistically  
372 inhibited ( $CI < 1$ ) the cisplatin-induced increase in %ALDH+ cells in OVCAR5 cells (Fig. 8B).  
373 Whereas, in OVSAHO cells, very low dose DAC (10 nM) with low dose NAMPTi and cisplatin  
374 synergistically inhibited ( $CI < 1$ ) the cisplatin-induced increase in %ALDH+ cells.

375 To confirm the effect of very low dose DAC and low dose NAMPT inhibition on cisplatin-  
376 induced enrichment of OCSCs, the ability of pretreated cells to grow as spheroids in stem cell  
377 media was examined. As expected, cisplatin pretreated cells were more spheroid-like compared  
378 to UT in both cell lines (Fig. 8C). Furthermore, cells pretreated with individual very low doses of  
379 DAC or low dose NAMPTi in combination with cisplatin pretreatment were similar to cisplatin  
380 pretreated cells (Fig. 8C; more spheroid-like and increased viability than UT). Importantly,  
381 combination pretreatment of very low dose DAC, low dose NAMPTi and cisplatin prevented  
382 cisplatin-induced spheroid formation and increase in viability. These data support the hypothesis  
383 that both pathways contribute to the cisplatin-induced enrichment of OCSCs.

384

## 385 **Discussion**

386

387 While HGSOC is initially highly responsive to chemotherapy, recurrence is common, and  
388 the majority of recurrent OC is chemotherapy resistant and fatal. OCSCs have increased  
389 resistance to chemotherapy and are enriched in OC relapses suggesting that OCSCs contribute to  
390 disease recurrence and resistance (4). Here we demonstrate that acute platinum treatment  
391 enriches the OCSC population, consistent with previous findings showing similar enrichment after

392 longer exposures to platinum (23, 43, 44). We identify two distinct pathways that drive  
393 chemotherapy-induced OCSC enrichment, one marked by reduced wildtype *BRCA1* expression  
394 and the other by increased NAD<sup>+</sup> levels. Blocking either pathway alone or inhibiting both  
395 pathways together by combining very low doses of specific inhibitors prevents acute platinum-  
396 induced OCSC enrichment in wildtype *BRCA1*, platinum-sensitive HGSOC. Our findings support  
397 using the novel combination treatment scheme as a neoadjuvant treatment to reduce the  
398 platinum-induced enrichment of ALDH<sup>+</sup> OCSCs and to avert the development of platinum  
399 resistance.

400 *BRCA1* is an OC susceptibility gene and *BRCA1* mutation increases the risk of developing  
401 OC (1). *BRCA1* plays a role in ICL repair as well as other parts of the DDR (16). Additionally, ICL  
402 accumulation following *BRCA1* depletion results in dedifferentiation of mammary epithelial cells  
403 to a more primitive, mesenchymal state (28). HGSOC accounts for approximately 70% of all EOC  
404 and the vast majority of patients diagnosed with HGSOC will have wildtype *BRCA1*. We  
405 demonstrate that platinum-induced a decrease in wildtype *BRCA1* expression that contributes to  
406 the observed enrichment of ALDH<sup>+</sup> cells and concurrent increase in the CSC phenotype. Inhibiting  
407 ATM in combination with platinum blocked the platinum-induced decrease in *BRCA1* expression  
408 and OCSC enrichment demonstrating that the DDR after platinum treatment is important for the  
409 proposed mechanism. Consistent with the requirement for the DDR, stable *BRCA1* knockdown  
410 without platinum treatment was not sufficient to increase the %ALDH<sup>+</sup> cells. We speculate that  
411 the platinum-induced decrease in *BRCA1* levels lead to persistent ICLs or alternative DNA repair  
412 pathway activation, which is required for but not sufficient for ALDH<sup>+</sup> OCSC cell enrichment.  
413 Reduced *BRCA1* levels may also contribute to senescence that occurs at later time-points post-

414 platinum, based on prior work demonstrating that alterations in BRCA1 after oncogene  
415 expression precede and contribute to oncogene-induced senescence (45).

416 *BRCA1* expression can be regulated by many mechanisms, including promoter DNA  
417 hypermethylation. Here we show that the cisplatin-induced decrease in BRCA1 levels correlated  
418 with an increase in *BRCA1* promoter DNA hypermethylation. Uniquely, we demonstrated that  
419 combining treatment with the DNMT inhibitor DAC with cisplatin blocks the cisplatin-induced  
420 increase in %ALDH<sup>+</sup> cells and spheroid formation. Both DAC treatment and expression of CpGi-  
421 null *BRCA1*, which also blocked the platinum-induced OCSC enrichment, maintained *BRCA1*  
422 expression levels at or above the levels of untreated cells even after cisplatin treatment. These  
423 findings lead us to suggest that there is a “threshold effect” for BRCA1 levels: BRCA1 levels at or  
424 above baseline prevent enrichment of ALDH<sup>+</sup> cells, and OCSC enrichment occurs when BRCA1  
425 levels fall below baseline in the presence of an activated DDR.

426 In addition to the DDR-dependent changes in *BRCA1* expression, we have reported that a  
427 parallel pathway exists where platinum induces an increase in NAD<sup>+</sup> levels, and altering this  
428 metabolic pathway is also required for platinum-induced OCSC enrichment. Metabolic pathways  
429 have been shown to contribute to platinum resistance (44). NAD<sup>+</sup> is a cofactor of ALDH enzymes  
430 that catalyze the oxidation of aldehydes (21) and are overexpressed in OCSCs. We demonstrated  
431 that elevated levels of NAD<sup>+</sup> correspond to the timing of ALDH<sup>+</sup> cell enrichment. Because NAD<sup>+</sup>  
432 is a cofactor for ALDH, the platinum-induced increase in cellular NAD<sup>+</sup> levels likely drives the  
433 increased ALDH activity of OCSCs. Furthermore, inhibition of NAMPT, the rate limiting enzyme  
434 for NAD<sup>+</sup> synthesis from the salvage pathway, blocked the cisplatin-induced enrichment of ALDH<sup>+</sup>  
435 cells. These findings are consistent with a recent study linking platinum exposure to increased

436 *NAMPT* expression and NAD<sup>+</sup> levels that are required for platinum-induced senescence-  
437 associated enrichment of OCSCs (23). However, we report that these changes occur a very early  
438 point post platinum (16 h versus 4 days) and at 16 h we do not observe indicators of senescence  
439 such as changes in *HMGA1* expression (data not shown), suggesting that our observed increases  
440 in *NAMPT* expression, NAD<sup>+</sup> levels and OCSC enrichment occur before and perhaps contribute to  
441 platinum-induced senescent phenotypes. Our studies combined with Nacarelli et al. support  
442 further preclinical and clinical studies aimed at investigating *NAMPT* inhibition as a potential  
443 therapeutic strategy to prevent the development of platinum resistant OC.

444       Loss of *BRCA1* induces metabolic reprogramming through the Nicotinamide N-  
445 methyltransferase (NNMT) pathway in OC cells (46). We show that the platinum-induced  
446 decrease in *BRCA1* levels occurs concomitantly with increased NAD<sup>+</sup> levels. NNMT is also involved  
447 in NAD<sup>+</sup> synthesis. NNMT transfers methyl group from S-adenosyl methionine (SAM) to  
448 nicotinamide (NAM) resulting in 1-methylnicotinamide (MNA) during the conversion of SAM to  
449 S-adenosyl-L-homocysteine (SAH). In the NAD<sup>+</sup> salvage pathway, *NAMPT* uses NAM as a  
450 substrate, ultimately resulting in the production of NAD<sup>+</sup> (19). Therefore, we hypothesized that  
451 the decrease in *BRCA1* expression and increase in NAD<sup>+</sup> levels may be mechanistically connected.  
452 However, even though expression of *BRCA1* in cells transfected with CpGi-null *BRCA1* blocks the  
453 platinum-induced increase in %ALDH<sup>+</sup> cells, NAD<sup>+</sup> levels still increase in these cells (Fig. 7D).  
454 Importantly, in *BRCA1* mutant HGSOV COV362 cells, cisplatin-induced an increase in *NAMPT*  
455 expression but no enrichment of ALDH<sup>+</sup> cells. However, as mentioned, inhibition of *NAMPT* was  
456 sufficient to block the platinum-induced increase in %ALDH<sup>+</sup> cells. We suggest that the platinum-  
457 induced decrease in *BRCA1* and increase in *NAMPT* and NAD<sup>+</sup> levels occur as part of distinct

458 parallel pathways which independently contribute to platinum-induced OCSC enrichment. Future  
459 studies will further investigate how these platinum-induced DDR and metabolic alterations result  
460 in OCSC enrichment.

461 Cellular NAD<sup>+</sup> is produced primarily in G1 and G2 cell cycle phases (47) and CDK1 inhibition  
462 has been shown to promote the nuclear localization of NAMPT to replenish decreased NAD<sup>+</sup>  
463 levels after CDK1 inhibitor treatment (48). We show that inhibiting CDK1 induces OCSC  
464 enrichment that is associated with an increase in *NAMPT* expression (Fig. 7B) but not a decrease  
465 in *BRCA1* expression (Fig. 7A), providing support for the hypothesis that the platinum-induced  
466 increase in *NAMPT* expression and NAD<sup>+</sup> levels are driven by cell cycle changes independent of  
467 changes in *BRCA1* expression. In response to DNA damage, BRCA1 is a part of a complex that  
468 initiates G2/M arrest to allow time for DNA damage repair (49). Consistent with this role, CpGi-  
469 null BRCA1 transfection increases the percentage of cells in the G2/M phase of cell cycle both  
470 with and without cisplatin treatment (Supplementary Fig. 6A). Interestingly, further connecting  
471 G2/M and NAD<sup>+</sup> levels, platinum-treated, CpGi-null BRCA1 transfected cells have elevated NAD<sup>+</sup>  
472 levels but are not enriched for OCSCs (Fig. 7D, (41)). Together these findings suggest that G2/M  
473 arrest leads to increased *NAMPT* expression and NAD<sup>+</sup> levels that contribute to OCSC enrichment;  
474 however, after platinum treatment, these changes must occur in conjunction with decreased  
475 levels of BRCA1, otherwise OCSC enrichment will be blocked. These data also demonstrate that  
476 the effect of BRCA1 overexpression on platinum-induced OCSC enrichment is independent of its  
477 effect on cell cycle.

478 Clinically, DNMT inhibitors have been used to re-sensitize chemoresistant OC cells to  
479 chemotherapy (33, 50-53). Our study extends these findings by demonstrating that DNMT

480 inhibitors may also be beneficial when used in combination with neoadjuvant/adjuvant  
481 chemotherapy in OC patients where they have the potential to block platinum-induced OCSC  
482 enrichment and establishment of platinum resistance. NAMPT inhibitors like FK866 and  
483 GMX1778 have been shown to have preclinical antitumor efficacy *in vivo* by suppressing  
484 chemoresistant senescence-associated enrichment of OCSCs (23). NAMPT inhibitors have also  
485 been clinically tested in advanced hematological and solid malignancies (54, 55). However, dose  
486 limiting toxicities were a significant problem and objective tumor remission was not observed.  
487 Even the currently used “low doses” of DNMT inhibitors still result in dose-limiting toxicities and  
488 adverse events (52, 53). Importantly, we demonstrate that the combination of very low dose  
489 DNMT inhibitors with low dose metabolic inhibitors provides an effective treatment scheme to  
490 prevent onset of platinum resistance in OC. Using lower concentrations of these inhibitors may  
491 reduce off-target cytotoxic effects and make the treatment more tolerable to patients.

492

## 493 **Methods and Materials**

### 494 **Cell lines, culture conditions, and reagents**

495 Epithelial OC cell lines OVCAR5, OVCAR3, COV362, OVSAHO and PEO1 were maintained at 37°C  
496 and 5% CO<sub>2</sub> humidified atmosphere using standard conditions (24, 25, 56). All cell lines were  
497 tested for mycoplasma in 2017 (ATCC, 30-1012K). For all treatments, 1 million cells were plated  
498 in a 100 mm<sup>2</sup> dish and treated the next day for the specified number of hours. Cisplatin (EMD  
499 Millipore, 232120) was dissolved in 154 mM NaCl at 1.67 nM, filter sterilized and stored at 4 °C.  
500 Cells were treated with cell line specific IC<sub>50</sub> dose of cisplatin (OVCAR5: 12.00 μM, OVSAHO: 4.00  
501 μM, OVCAR3, 15.00 μM, PEO1: 12.84 μM, COV362: 13.57 μM) (24). CDK1 inhibitor (Sigma-

502 Aldrich, SML0569) was dissolved in DMSO and stored (-20 °C, 10 mM stock solution). Decitabine  
503 (Sigma, A3656) was solubilized in dH<sub>2</sub>O and stored (-80 °C, 2 µg/µL stock solution). Cells were  
504 treated with CDK1i (9 µM for 16 h) or DAC (100 nM for 48 h). Media containing fresh DAC was  
505 changed every 24 h. Cisplatin was added during the last 16 h of DAC treatment. NAMPT inhibitor  
506 (Sigma-Aldrich, SML1348) was dissolved in DMSO and stored (4 °C, 10 mM stock solution). Cells  
507 were treated with NAMPTi (50 nM for 6h). For cisplatin and NAMPTi dual treatment, cells were  
508 treated with cisplatin as mentioned above, then NAMPTi was added 10 h later. For low dose  
509 NAMPTi and DAC combination treatment with cisplatin, cells were treated with DAC (10 nM or  
510 20 nM for 48 h), cisplatin was added in the last 16 h and NAMPTi (12.5 nM) was added during the  
511 last 6 h of the DAC treatment. ATM inhibitor KU-55933 (Sigma, MO #SML1109) was dissolved in  
512 DMSO and stored (-20 °C, 10 mM stock solution). Cells were treated with 15 µM ATMi for 16 h in  
513 combination with cisplatin.

514

#### 515 **ALDEFLUOR assay and flow cytometry**

516 ALDH activity was measured through ALDEFLUOR assay (Stem Cell technologies, 01700). Cultured  
517 cells were trypsinized, washed with 1X PBS and 1 million cells were resuspended in 1 mL  
518 ALDEFLUOR assay buffer containing substrate, bodipyaminoacetaldehyde (BAAA). Next, 0.5 mL  
519 of resuspended mixture was moved to another tube containing ALDH inhibitor, 5 µL 1.5 mM  
520 diethylamino benzaldehyde (DEAB). These solutions were incubated for 30-40 min at 37 °C in the  
521 dark. After incubation, cells were centrifuged and resuspended in fresh ALDEFLUOR assay buffer  
522 and filtered through a 30 µm filter (Sysmex).



523 Flow cytometry analysis was performed on a LSRII flow cytometer (BD Biosciences) at IU  
524 Flow Cytometry Core Facility. ALDH activity was measured using 488 nm excitation and the signal  
525 was detected using the 530/30 filter and analyzed at least three times in independent  
526 experiments. For each experiment, 10,000 events were analyzed. ALDH+ percentage gate was  
527 determined by sample specific negative control (DEAB) ALDH+ gate. Further data analysis was  
528 done in FlowJo software (Becton, Dickinson & Company).

529

### 530 **Cell cycle analysis**

531 Nuclear-ID red DNA stain (Enzo Life Sciences, ENZ-52406) was used to analyze cell cycle to allow  
532 for combination with the ALDFLUOR assay, which requires live cells. After treatment with  
533 cisplatin, cells were trypsinized and resuspended in 1X PBS. Then, 1:250 dilution of Nuclear-ID  
534 red DNA stain was added to the total volume and solution was incubated for 30 min at 37 °C in  
535 the dark. To determine cell cycle profile for ALDH+ population, cells were first suspended with  
536 ALDEFLUOR reagent and incubated for 30 min at 37 °C, followed by Nuclear-ID stain as above  
537 and then, analyzed by flow cytometry using the LSRII. Nuclear ID was excited at 561 nm and  
538 detected using the 670/30 filter and analyzed at least three times in independent experiments.  
539 For each experiment, 10,000 events were analyzed. FlowJo software was used for data analysis.

540

### 541 **Quantitative RT-PCR (qRT-PCR)**

542 Total RNA was isolated from cell pellets using RNeasy Mini Kit (Qiagen, 74104) and cDNA was  
543 generated using Maxima First Strand cDNA Synthesis Kit for RT-qPCR (Thermo Fisher Scientific,  
544 K1642). qPCR was done on a LightCycler 96 using TaqMan MasterMix (Thermo Fisher,

545 04535286001) or FastStart Essential DNA Green Master (Roche, 06402712001). C<sub>q</sub> values for  
546 genes of interest were normalized to housekeeping genes (*PPIA*, *β-Actin* or *RhoA*) using the  
547 deltaC<sub>q</sub> method. Detailed information for primers can be found in Supplementary Table S1.

548

#### 549 **DNA extraction, bisulfite conversion, qMSP and bisulfite sequencing**

550 DNA was extracted from cell pellets using the DNeasy Blood and Tissue Kit (Qiagen, 69504) and  
551 bisulfite treated using the EZ DNA Methylation-Gold kit (Zymo Research, D5006). For qMSP,  
552 methods were followed as described in a previous publication (57). qMSP primers used are listed  
553 in supplementary methods table S1. For bisulfite sequencing, bisulfite converted DNA was  
554 amplified using AmpliTaq Gold 360 Mastermix (ThermoFisher Scientific, 4398881) using primers  
555 listed in the supplementary methods table S1. Then, the amplified product was run on an agarose  
556 gel, the correct band was excised from the gel, and DNA was purified using the QIAquick Gel  
557 Extraction kit (Qiagen, 28704). The DNA was then cloned into One Shot™ TOP10 Chemically  
558 Competent *E. coli* using the TOPO™ TA Cloning™ Kit for Sequencing (ThermoFisher Scientific,  
559 451641). The next day, white colonies were inoculated in LB+ carbenicillin media overnight and  
560 plasmid was extracted using Zyppy Plasmid Miniprep Kit (Zymo research, D4020) and sequenced  
561 by Sanger sequencing. Sequence peaks were analyzed for good quality in 4peaks software and  
562 DNA methylation maps were generated through BioAnalyzer (Max-Planck-Institute for  
563 Informatics and Saarland University, Saarbrücken, Germany) (58).

564

#### 565 **Western blot analysis**

566 Cell pellets were lysed in 4% SDS buffer using a QIAshredder (Qiagen, 79654). After protein was  
567 extracted, western blotting was performed. Antibodies used are listed in supplementary  
568 methods. Band density was measured by ImageJ software (NIH) and normalized to laminB,  $\beta$  -  
569 actin or vimentin.

570

### 571 **Spheroid formation assay**

572  $1.5 \times 10^4$  cells pre-treated with cisplatin (6  $\mu$ M for 3 h), NAMPTi (50 nM for 6 h), and/or DAC (100  
573 nM for 48 h) were plated in a 24-well low attachment plate (Corning, 3473) containing stem cell  
574 media (43) for 14 days. Media was added every 3 days to each well. On day 14, images were  
575 taken using an EVOS FL Auto microscope (Life Technologies). Then, cell viability reagent (Abcam,  
576 ab176748), which measures cell viability by intracellular esterase activity, was added directly to  
577 each spheroid well at a volume equal to the volume of media in the well. After 1 h incubation,  
578 the reagent+ media solution was distributed in an opaque 96-well plate. Viability (Ex/Em:  
579 405/460 nm) was measured using a SynergyH1 plate reader (BioTek). The experiment was done  
580 in 4 technical replicates for each condition.

581

### 582 **NAD<sup>+</sup>/NADH ratio**

583 NAD<sup>+</sup>/NADH ratio was calculated using NAD<sup>+</sup>/NADH quantification colorimetric kit (BioVision,  
584 K337-100) according to the manufacturer's instructions.

585

### 586 **Transfection**

587 1 million cultured cells were transfected with plasmid using Turbofect (ThermoFisher Scientific,  
588 R0532) 48 h before treatment and then cells were collected. pBABEpuro HA-BRCA1 was a gift  
589 from Stephen Elledge (Addgene plasmid # 14999; <http://n2t.net/addgene:14999>;  
590 RRID:Addgene\_14999) (59). pBABE-puro was a gift from Hartmut Land, Jay Morgenstern and Bob  
591 Weinberg (Addgene plasmid # 1764; <http://n2t.net/addgene:1764> ; RRID:Addgene\_1764) (60).

592

### 593 **Viral shRNA knockdown preparation and stable cell line knockdown generation**

594 For BRCA1 knockdown, shRNA1 (Sigma, TRCN0000244986) and shRNA2 (Sigma,  
595 TRCN0000244984) and empty vector (EV) TRC2 (Sigma, SHC201) were used and lentiviral shRNA  
596 was created following the protocol as previously described (56). For cell line infection,  $2 \times 10^5$   
597 cells/mL were plated and after 24 h, virus was added in media with polybrene. Puromycin was  
598 added 24 h post-viral infection and cells were plated for downstream experiments once  
599 confluent.

600

### 601 **Statistical methods**

602 All experiments were performed in at least three biological replicates. When two groups were  
603 compared, statistical comparison was performed by Student's t-test. One-way ANOVA followed  
604 by Tukey post hoc test was used to compare multiple groups using Graphpad Prism.

605

### 606 **References:**

607 1. Siegel RL, Miller KD, Jemal A. Cancer Statistics, 2017. *CA Cancer J Clin* **67**, 7-30, (2017)

- 608 2. Torre LA, Trabert B, DeSantis CE, Miller KD, Samimi G, Runowicz CD, et al. Ovarian  
609 cancer statistics, 2018. *CA Cancer J Clin* **68**, 284-296, (2018)
- 610 3. Matulonis UA, Sood AK, Fallowfield L, Howitt BE, Sehouli J, Karlan BY. Ovarian cancer.  
611 *Nat Rev Dis Primers* **2**, 16061, (2016)
- 612 4. Wang Y, Cardenas H, Fang F, Condello S, Taverna P, Segar M, et al. Epigenetic targeting  
613 of ovarian cancer stem cells. *Cancer Res* **74**, 4922-4936, (2014)
- 614 5. Roy L, Cowden Dahl KD. Can Stemness and Chemoresistance Be Therapeutically  
615 Targeted via Signaling Pathways in Ovarian Cancer? *Cancers (Basel)* **10**, (2018)
- 616 6. Lupia M, Cavallaro U. Ovarian cancer stem cells: still an elusive entity? *Mol Cancer* **16**,  
617 64, (2017)
- 618 7. Silva IA, Bai S, McLean K, Yang K, Griffith K, Thomas D, et al. Aldehyde dehydrogenase in  
619 combination with CD133 defines angiogenic ovarian cancer stem cells that portend poor  
620 patient survival. *Cancer Res* **71**, 3991-4001, (2011)
- 621 8. Lobo NA, Shimono Y, Qian D, Clarke MF. The biology of cancer stem cells. *Annu Rev Cell*  
622 *Dev Biol* **23**, 675-699, (2007)
- 623 9. Chaney SG, Campbell SL, Bassett E, Wu Y. Recognition and processing of cisplatin- and  
624 oxaliplatin-DNA adducts. *Crit Rev Oncol Hematol* **53**, 3-11, (2005)
- 625 10. Maugeri-Sacca M, Bartucci M, De Maria R. DNA damage repair pathways in cancer stem  
626 cells. *Mol Cancer Ther* **11**, 1627-1636, (2012)
- 627 11. Wagner JM, Karnitz LM. Cisplatin-induced DNA damage activates replication checkpoint  
628 signaling components that differentially affect tumor cell survival. *Mol Pharmacol* **76**, 208-214,  
629 (2009)

- 630 12. Abdullah LN, Chow EK. Mechanisms of chemoresistance in cancer stem cells. *Clin Transl*  
631 *Med* **2**, 3, (2013)
- 632 13. Venkitaraman AR. Functions of BRCA1 and BRCA2 in the biological response to DNA  
633 damage. *J Cell Sci* **114**, 3591-3598, (2001)
- 634 14. Pathania S, Nguyen J, Hill SJ, Scully R, Adelmant GO, Marto JA, et al. BRCA1 is required  
635 for postreplication repair after UV-induced DNA damage. *Mol Cell* **44**, 235-251, (2011)
- 636 15. Silver DP, Livingston DM. Mechanisms of BRCA1 tumor suppression. *Cancer Discov* **2**,  
637 679-684, (2012)
- 638 16. Roy R, Chun J, Powell SN. BRCA1 and BRCA2: different roles in a common pathway of  
639 genome protection. *Nat Rev Cancer* **12**, 68-78, (2011)
- 640 17. Maxwell KN, Wubbenhorst B, Wenz BM, De Sloover D, Pluta J, Emery L, et al. BRCA  
641 locus-specific loss of heterozygosity in germline BRCA1 and BRCA2 carriers. *Nat Commun* **8**, 319,  
642 (2017)
- 643 18. Chiang JW, Karlan BY, Cass L, Baldwin RL. BRCA1 promoter methylation predicts adverse  
644 ovarian cancer prognosis. *Gynecol Oncol* **101**, 403-410, (2006)
- 645 19. Yaku K, Okabe K, Hikosaka K, Nakagawa T. NAD Metabolism in Cancer Therapeutics.  
646 *Front Oncol* **8**, 622, (2018)
- 647 20. Hayes K, Noor M, Djeghader A, Armshaw P, Pembroke T, Tofail S, et al. The quaternary  
648 structure of *Thermus thermophilus* aldehyde dehydrogenase is stabilized by an evolutionary  
649 distinct C-terminal arm extension. *Sci Rep* **8**, 13327, (2018)

- 650 21. Liu ZJ, Sun YJ, Rose J, Chung YJ, Hsiao CD, Chang WR, et al. The first structure of an  
651 aldehyde dehydrogenase reveals novel interactions between NAD and the Rossmann fold. *Nat*  
652 *Struct Biol* **4**, 317-326, (1997)
- 653 22. Li D, Chen NN, Cao JM, Sun WP, Zhou YM, Li CY, et al. BRCA1 as a nicotinamide adenine  
654 dinucleotide (NAD)-dependent metabolic switch in ovarian cancer. *Cell Cycle* **13**, 2564-2571,  
655 (2014)
- 656 23. Nacarelli T, Fukumoto T, Zundell JA, Fatkhutdinov N, Jean S, Cadungog MG, et al. NAMPT  
657 Inhibition Suppresses Cancer Stem-like Cells Associated with Therapy-Induced Senescence in  
658 Ovarian Cancer. *Cancer Res* **80**, 890-900, (2020)
- 659 24. Haley J, Tomar S, Pulliam N, Xiong S, Perkins SM, Karpf AR, et al. Functional  
660 characterization of a panel of high-grade serous ovarian cancer cell lines as representative  
661 experimental models of the disease. *Oncotarget* **7**, 32810-32820, (2016)
- 662 25. Pulliam N, Fang F, Ozes AR, Tang J, Adewuyi A, Keer H, et al. An Effective Epigenetic-  
663 PARP Inhibitor Combination Therapy for Breast and Ovarian Cancers Independent of BRCA  
664 Mutations. *Clin Cancer Res* **24**, 3163-3175, (2018)
- 665 26. Mitra AK, Davis DA, Tomar S, Roy L, Gurler H, Xie J, et al. In vivo tumor growth of high-  
666 grade serous ovarian cancer cell lines. *Gynecol Oncol* **138**, 372-377, (2015)
- 667 27. Tomita H, Tanaka K, Tanaka T, Hara A. Aldehyde dehydrogenase 1A1 in stem cells and  
668 cancer. *Oncotarget* **7**, 11018-11032, (2016)
- 669 28. Wang H, Bieri B, Li AG, Pathania S, Toomire K, Dimitrov SD, et al.  
670 BRCA1/FANCD2/BRG1-Driven DNA Repair Stabilizes the Differentiation State of Human  
671 Mammary Epithelial Cells. *Mol Cell* **63**, 277-292, (2016)

- 672 29. Kondrashova O, Topp M, Nesic K, Lieschke E, Ho GY, Harrell MI, et al. Methylation of all  
673 BRCA1 copies predicts response to the PARP inhibitor rucaparib in ovarian carcinoma. *Nat*  
674 *Commun* **9**, 3970, (2018)
- 675 30. Greenberg MVC, Bourc'his D. The diverse roles of DNA methylation in mammalian  
676 development and disease. *Nat Rev Mol Cell Biol* **20**, 590-607, (2019)
- 677 31. Daley JM, Sung P. 53BP1, BRCA1, and the choice between recombination and end  
678 joining at DNA double-strand breaks. *Mol Cell Biol* **34**, 1380-1388, (2014)
- 679 32. Podhorecka M, Skladanowski A, Bozko P. H2AX Phosphorylation: Its Role in DNA  
680 Damage Response and Cancer Therapy. *J Nucleic Acids* **2010**, (2010)
- 681 33. Fang F, Balch C, Schilder J, Breen T, Zhang S, Shen C, et al. A phase 1 and  
682 pharmacodynamic study of decitabine in combination with carboplatin in patients with  
683 recurrent, platinum-resistant, epithelial ovarian cancer. *Cancer* **116**, 4043-4053, (2010)
- 684 34. Yu J, Qin B, Moyer AM, Nowsheen S, Liu T, Qin S, et al. DNA methyltransferase  
685 expression in triple-negative breast cancer predicts sensitivity to decitabine. *J Clin Invest* **128**,  
686 2376-2388, (2018)
- 687 35. Bellio C, DiGloria C, Foster R, James K, Konstantinopoulos PA, Growdon WB, et al. PARP  
688 Inhibition Induces Enrichment of DNA Repair-Proficient CD133 and CD117 Positive Ovarian  
689 Cancer Stem Cells. *Mol Cancer Res* **17**, 431-445, (2019)
- 690 36. Vassilev LT. Cell cycle synchronization at the G2/M phase border by reversible inhibition  
691 of CDK1. *Cell Cycle* **5**, 2555-2556, (2006)
- 692 37. Hochegger H, Takeda S, Hunt T. Cyclin-dependent kinases and cell-cycle transitions:  
693 does one fit all? *Nat Rev Mol Cell Biol* **9**, 910-916, (2008)



- 694 38. Perez-Miller SJ, Hurley TD. Coenzyme isomerization is integral to catalysis in aldehyde  
695 dehydrogenase. *Biochemistry* **42**, 7100-7109, (2003)
- 696 39. Kennedy BE, Sharif T, Martell E, Dai C, Kim Y, Lee PW, et al. NAD(+) salvage pathway in  
697 cancer metabolism and therapy. *Pharmacol Res* **114**, 274-283, (2016)
- 698 40. Espindola-Netto JM, Chini CCS, Tarrago M, Wang E, Dutta S, Pal K, et al. Preclinical  
699 efficacy of the novel competitive NAMPT inhibitor STF-118804 in pancreatic cancer. *Oncotarget*  
700 **8**, 85054-85067, (2017)
- 701 41. Wang L, Zeng X, Chen S, Ding L, Zhong J, Zhao JC, et al. BRCA1 is a negative modulator of  
702 the PRC2 complex. *EMBO J* **32**, 1584-1597, (2013)
- 703 42. Chou TC. Drug combination studies and their synergy quantification using the Chou-  
704 Talalay method. *Cancer Res* **70**, 440-446, (2010)
- 705 43. Wang Y, Zong X, Mitra S, Mitra AK, Matei D, Nephew KP. IL-6 mediates platinum-induced  
706 enrichment of ovarian cancer stem cells. *JCI Insight* **3**, (2018)
- 707 44. Matassa DS, Amoroso MR, Lu H, Avolio R, Arzeni D, Procaccini C, et al. Oxidative  
708 metabolism drives inflammation-induced platinum resistance in human ovarian cancer. *Cell*  
709 *Death Differ* **23**, 1542-1554, (2016)
- 710 45. Tu Z, Aird KM, Bitler BG, Nicodemus JP, Beeharry N, Xia B, et al. Oncogenic RAS regulates  
711 BRIP1 expression to induce dissociation of BRCA1 from chromatin, inhibit DNA repair, and  
712 promote senescence. *Dev Cell* **21**, 1077-1091, (2011)
- 713 46. Kanakkanthara A, Kurmi K, Ekstrom TL, Hou X, Purfeerst ER, Heinzen EP, et al. BRCA1  
714 Deficiency Upregulates NNMT, Which Reprograms Metabolism and Sensitizes Ovarian Cancer  
715 Cells to Mitochondrial Metabolic Targeting Agents. *Cancer Res* **79**, 5920-5929, (2019)

- 716 47. Yu FX, Dai RP, Goh SR, Zheng L, Luo Y. Logic of a mammalian metabolic cycle: an  
717 oscillated NAD<sup>+</sup>/NADH redox signaling regulates coordinated histone expression and S-phase  
718 progression. *Cell Cycle* **8**, 773-779, (2009)
- 719 48. Svoboda P, Krizova E, Sestakova S, Vapenkova K, Knejzlik Z, Rimpelova S, et al. Nuclear  
720 transport of nicotinamide phosphoribosyltransferase is cell cycle-dependent in mammalian  
721 cells, and its inhibition slows cell growth. *J Biol Chem* **294**, 8676-8689, (2019)
- 722 49. Loblrich M, Jeggo PA. The impact of a negligent G2/M checkpoint on genomic instability  
723 and cancer induction. *Nat Rev Cancer* **7**, 861-869, (2007)
- 724 50. Fang F, Zuo Q, Pilrose J, Wang Y, Shen C, Li M, et al. Decitabine reactivated pathways in  
725 platinum resistant ovarian cancer. *Oncotarget* **5**, 3579-3589, (2014)
- 726 51. Matei D, Fang F, Shen C, Schilder J, Arnold A, Zeng Y, et al. Epigenetic resensitization to  
727 platinum in ovarian cancer. *Cancer Res* **72**, 2197-2205, (2012)
- 728 52. Matei D, Ghamande S, Roman L, Alvarez Secord A, Nemunaitis J, Markham MJ, et al. A  
729 Phase I Clinical Trial of Guadecitabine and Carboplatin in Platinum-Resistant, Recurrent Ovarian  
730 Cancer: Clinical, Pharmacokinetic, and Pharmacodynamic Analyses. *Clin Cancer Res* **24**, 2285-  
731 2293, (2018)
- 732 53. Oza AM, Matulonis UA, Alvarez Secord A, Nemunaitis J, Roman LD, Blagden SP, et al. A  
733 Randomized Phase II Trial of Epigenetic Priming with Guadecitabine and Carboplatin in  
734 Platinum-resistant, Recurrent Ovarian Cancer. *Clin Cancer Res* **26**, 1009-1016, (2020)
- 735 54. Holen K, Saltz LB, Hollywood E, Burk K, Hanauske AR. The pharmacokinetics, toxicities,  
736 and biologic effects of FK866, a nicotinamide adenine dinucleotide biosynthesis inhibitor. *Invest*  
737 *New Drugs* **26**, 45-51, (2008)

- 738 55. von Heideman A, Berglund A, Larsson R, Nygren P. Safety and efficacy of NAD depleting  
739 cancer drugs: results of a phase I clinical trial of CHS 828 and overview of published data.  
740 *Cancer Chemother Pharmacol* **65**, 1165-1172, (2010)
- 741 56. Sriramkumar S, Matthews TD, Ghobashi AH, Miller SA, VanderVere-Carozza PS,  
742 Pawelczak KS, et al. Platinum-Induced Ubiquitination of Phosphorylated H2AX by RING1A Is  
743 Mediated by Replication Protein A in Ovarian Cancer. *Mol Cancer Res* **18**, 1699-1710, (2020)
- 744 57. Maiuri AR, Peng M, Podicheti R, Sriramkumar S, Kamplain CM, Rusch DB, et al. Mismatch  
745 Repair Proteins Initiate Epigenetic Alterations during Inflammation-Driven Tumorigenesis.  
746 *Cancer Res* **77**, 3467-3478, (2017)
- 747 58. Bock C, Reither S, Mikeska T, Paulsen M, Walter J, Lengauer T. BiQ Analyzer:  
748 visualization and quality control for DNA methylation data from bisulfite sequencing.  
749 *Bioinformatics* **21**, 4067-4068, (2005)
- 750 59. Cortez D, Wang Y, Qin J, Elledge SJ. Requirement of ATM-dependent phosphorylation of  
751 brca1 in the DNA damage response to double-strand breaks. *Science* **286**, 1162-1166, (1999)
- 752 60. Morgenstern JP, Land H. Advanced mammalian gene transfer: high titre retroviral  
753 vectors with multiple drug selection markers and a complementary helper-free packaging cell  
754 line. *Nucleic Acids Res* **18**, 3587-3596, (1990)

755

## 756 **Acknowledgments**

757 We thank the Indiana University Flow Cytometry Core Facility for their assistance.

758

759 **Conflict of Interest Statement:** The authors declare no competing interests.

760

761 **Author Contribution Statement:**

762 R.S., K.P.N. and H.O.H performed study concept and design; R.S. and H.O.H. performed  
763 development of methodology and writing; R.S, C.H., K.P.N., H.O.H., S.S. performed review and  
764 revision of paper; R.S., S.K. and S.S. provided acquisition, analysis and interpretation of data and  
765 statistical analysis; C.H. provided technical and material support

766

767 **Ethics statement:** Study did not require ethical approval

768

769 **Funding statement:** This research was funded by Ovarian Cancer Research Alliance grant  
770 number 458788 to HMOH and KPN and in part through the IU Simon Cancer Center P30  
771 Support Grant (P30CA082709). SS was supported by the Doane and Eunice Dahl Wright  
772 Fellowship generously provided by Ms. Imogen Dahl.

773

774 **Figure Legends:**

775 **Fig 1. Cisplatin treatment enriches for ALDH+ cells.** A) %ALDH+ cells determined using the  
776 ALDEFLUOR assay after mock (UT) or cisplatin (IC50 dose) treatment for the indicated time points.  
777 N=3. **B)** Images of spheroids after mock (UT) or cisplatin (3 h, ½ IC50) pretreatment in indicated  
778 cell lines. Scale bar = 500 µm. Graph depicts fluorescence intensity (RFU) of CytoCalcein Violet  
779 450 stain. N=4. **C)** Relative *BRCA1* RNA expression in indicated cell lines after mock (UT) or  
780 cisplatin treatment (16 h, IC50) for the indicated time points and cell lines. N=3. **B)** Western blot  
781 and relative densitometry of whole cell lysates after mock (UT) or cisplatin (16 h, IC50) treatment

782 for the indicated time points and cell lines. N=3. For all panels, graphs indicate mean +/- SEM,  
783 \* $P < 0.05$ , \*\* $P < 0.001$ , \*\*\* $P < 0.0001$ , \*\*\*\* $P < 0.00001$ .

784

785 **Fig 2. Cisplatin-induced decrease in *BRCA1* levels is associated with promoter DNA**  
786 **hypermethylation. A)** Quantitative MSP for *BRCA1* promoter DNA methylation. Graphs depict  
787 mean + SEM. N=3. **B)** The location and methylation status of CpG sites in promoter region of  
788 *BRCA1* gene. Location of qMSP primers are indicated. The arrow at the transcription start site  
789 (TSS) indicates transcription direction. Individual CpG dinucleotides are shown as circles with  
790 closed circles: methylation and open circles: unmethylated. Sequencing of ten individual clones  
791 for each sample was performed from bisulfite-converted mock (UT) or cisplatin (16H, IC50)  
792 treated DNA. **C)** Percentage of methylated CpGs per clone using data presented in B. Graphs  
793 depict mean + SEM. N=10. **D)** Western blot of OVCAR5 whole cell lysates after mock (UT) or  
794 cisplatin (IC50 dose) treatment for the indicated time points. For all panels \* $P < 0.05$ , \*\* $P < 0.001$ ,  
795 \*\*\* $P < 0.0001$ .

796

797 **Fig 3. The cisplatin-induced decrease in *BRCA1* is required for the associated increase in**  
798 **%ALDH+ cells. A)** Relative *BRCA1* RNA expression in OVCAR5 cells after stable lentiviral infection  
799 with mock (EV) or *BRCA1* shRNA1/2 with or without cisplatin treatment (16 h, IC50). Graphs  
800 depict mean + SEM. N=3. **B)** Western blot and relative densitometry of OVCAR5 whole cell lysates  
801 after mock (EV) with or without cisplatin treatment (16 h, IC50) or *BRCA1* shRNA1/2. N=3. **C)**  
802 Percentage of ALDH+ cells using the ALDEFLUOR assay after stable lentiviral infection with mock  
803 (EV) with or without cisplatin treatment (16 h, IC50) or *BRCA1* shRNA1/2. N=3. **D)** Relative *BRCA1*

804 RNA expression in indicated cell lines after mock (DMSO), cisplatin treatment (16 h, IC50), ATMi  
805 (16 h, 152  $\mu$ M) or ATMi (16 h, 152  $\mu$ M) + cisplatin (16 h, IC50). N=3. **E)** Percentage of ALDH+ cells  
806 using the ALDEFLUOR assay in indicated cell lines treated as in D. N=3. **F)** Relative *BRCA1* RNA  
807 expression in cells transfected with mock empty vector (EV) or CpGi-null *BRCA1* plasmid and  
808 treated with or without cisplatin (16 h, IC50) in the indicated cell lines. N=3. **G)** Western blot and  
809 relative densitometry of *OVCAR5* whole cell lysates transfected and treated as in F. N=3. **H)**  
810 Percentage of ALDH+ cells using the ALDEFLUOR assay after transfection with mock empty vector  
811 (EV) or CpGi-null *BRCA1* (*BRCA1*) plasmid and treatment as in F in indicated cell lines. N=3. For all  
812 panels, graphs indicate mean  $\pm$  SEM, \* $P$ <0.05, \*\* $P$ <0.001, \*\*\* $P$ <0.0001.

813

814 **Fig 4. Decitabine treatment abrogates the cisplatin induced increase in %ALDH+ cells. A)** The  
815 location and methylation status of CpG sites in the *BRCA1* promoter from bisulfite-converted  
816 mock (UT), cisplatin treatment (16 h, IC50), DAC (48 h, 100 nM) or DAC (48 h, 100 nM) + cisplatin  
817 (16 h, IC50) treated DNA. Closed circles: methylation and open circles: unmethylated. Sequencing  
818 of ten individual clones for each sample was performed. **B)** Relative *BRCA1* RNA expression after  
819 treatment as in A in indicated cell lines. N=3. **C)** Western blot and relative densitometry of  
820 *OVCAR5* whole cell lysates after treatment as in A in *OVCAR5* cells. N=3. **D)** Percentage of ALDH+  
821 cells using the ALDEFLUOR assay after treatment as in A in indicated cell lines. N=3. **E)** Images of  
822 spheroids after pretreatment with mock (UT), cisplatin (3 h,  $\frac{1}{2}$  IC50), DAC (48 h, 100 nM) or DAC  
823 (48 h, 100 nM) + cisplatin (3 h,  $\frac{1}{2}$  IC50). Scale bar = 500  $\mu$ m. Graph depicts relative fluorescence  
824 units (RFU) of CytoCalcein Violet 450 stain. N=4. For all panels, graphs indicate mean  $\pm$  SEM,  
825 \* $P$ <0.05, \*\* $P$ <0.001, \*\*\* $P$ <0.0001.

826

827 **Fig 5. G2/M cell cycle arrest results in an increase %ALDH+ cells. A)** Percentage of ALDH+ and  
828 ALDH- cells in G1, S and G2/M phases of the cell cycle for indicated cell lines. N=3. **B)** Percentage  
829 of ALDH+ and ALDH- cells in G1, S and G2/M phases of the cell cycle after mock (UT) or cisplatin  
830 treatment (16 h, IC50) in OVCAR5 cells. **C)** Percentage of cells in G2/M after mock (UT), DMSO,  
831 cisplatin (16 h, IC50) or CDK1 inhibitor (16 h, 9  $\mu$ M) treatment in indicated cell lines. N=3. **D)** Total  
832 percentage of ALDH+ cells treated as in C in indicated cell lines. N=3. For all panels, graphs  
833 indicate mean  $\pm$  SEM, \* $P$ <0.05, \*\* $P$ <0.001, \*\*\* $P$ <0.0001.

834

835 **Fig 6. NAMPT inhibition abrogates cisplatin-induced enrichment of ALDH+ cells. A)** Total NAD<sup>+</sup>  
836 (pmol/cells) in OVCAR5 cells after mock (UT) or cisplatin (16 h, IC50) treatment. N=3. **B)** Relative  
837 *NAMPT* RNA expression after mock or cisplatin (IC50 dose) treatment for the indicated time  
838 points and cell lines. N=3. **C)** Total NAD<sup>+</sup> (pmol/cells) in OVCAR5 cells after mock (UT), cisplatin  
839 (16 h, IC50), NAMPTi (6 h, 50 nM), cisplatin (16 h, IC50) + DMSO or NAMPTi (6 h, 50 nM) + cisplatin  
840 (16 h, IC50) treatment. N=3. **D)** Percentage of ALDH+ cells using the ALDEFLUOR assay after  
841 treatment as in C in indicated cell lines. N=3. **E)** Images of spheroids after pretreatment with mock  
842 (DMSO), cisplatin (3 h,  $\frac{1}{2}$  IC50), NAMPTi (6 h, 50 nM), or NAMPTi (6 h, 50 nM) + cisplatin treatment  
843 (3 h,  $\frac{1}{2}$  IC50). Scale bar = 500  $\mu$ m. Graph depicts relative fluorescence units (RFU) of CytoCalcein  
844 Violet 450 stain. N=4. For all panels, graphs indicate mean  $\pm$  SEM, \* $P$ <0.05, \*\* $P$ <0.001,  
845 \*\*\* $P$ <0.0001.

846

847 **Fig 7. Cisplatin treatment induces two separate pathways to increase %ALDH+ cells. A)** Relative  
848 *BRCA1* RNA expression after treatment with mock (UT), DMSO, cisplatin (16 h, IC50) or CDK1  
849 inhibitor (16 h, 9  $\mu$ M) treatment in indicated cell lines. N=3. **B)** Relative *NAMPT* RNA expression  
850 after treatment as in A in indicated cell lines. N=3. **C)** Relative *NAMPT* RNA expression in  
851 untransfected (UT) or transfected with mock empty vector (EV) or CpGi-null *BRCA1* plasmid and  
852 treated with or without cisplatin (16 h, IC50) in the indicated cell lines. For OVCAR5, \* indicates  
853 comparison between the indicated sample type and untransfected control with no treatment.  
854 N=3. **D)** Total NAD<sup>+</sup> (pmol/cells) in untransfected (UT) or transfected with mock empty vector  
855 (EV) or CpGi-null *BRCA1* (*BRCA1*) plasmid and treated with or without cisplatin (16 h, IC50) in  
856 OVCAR5 cells. N=3. **E)** Relative *NAMPT* RNA expression after mock (UT), cisplatin treatment (16  
857 h, IC50), DAC (48 h, 100 nM) or DAC (48 h, 100 nM) + cisplatin (16 h, IC50) treatment in indicated  
858 cell lines. N=3. For all panels, graphs indicate mean +/- SEM, \* $P$ <0.05, \*\* $P$ <0.001, \*\*\* $P$ <0.0001,  
859 \*\*\*\* $P$ <0.00001.

860

861 **Fig 8. Dual DNMTi and NAMPTi treatment abrogate cisplatin-induced OCSC enrichment. A)**  
862 Percentage of ALDH+ cells using the ALDEFLUOR assay after treatment with mock (DMSO),  
863 cisplatin (16 h, IC50), DAC (48 h, 10 nM or 20 nM) + cisplatin, NAMPTi (6 h, 12.5 nM) + cisplatin  
864 treatment or NAMPTi +DAC + cisplatin treated in indicated cell lines. N=3. **B)** Combination index  
865 plot for cells treated as described in A; x-axis represents fraction affected (Fa) and y-axis  
866 represents combination index. Combinates beneath the dashed line are synergistic. **C)** Images of  
867 spheroids after mock (DMSO), cisplatin (3 h,  $\frac{1}{2}$  IC50), DAC (48 h, 10 nM or 20 nM) + cisplatin,  
868 NAMPTi (6 h, 12.5 nM) + cisplatin treatment or NAMPTi +DAC + cisplatin treated in indicated cell



869 lines. Scale bar = 500  $\mu$ m. Graph depicts fluorescence intensity (RFU) of CytoCalcein Violet 450  
870 stain. N=4. For all panels, Graphs depict mean +/- SEM. a indicates comparison between the  
871 indicated sample type and DMSO treated sample. b indicates comparison between the indicated  
872 sample type and cisplatin treated sample. c indicates comparison between the indicated sample  
873 type and NAMPTi+ cisplatin treated sample. d indicates comparison between the indicated  
874 sample type and DAC (10 nM) + cisplatin treated sample. e indicates comparison between the  
875 indicated sample type and DAC (20 nM) + cisplatin treated sample. f indicates comparison  
876 between the indicated sample type and NAMPTi + DAC (10 nM) + cisplatin treated sample.

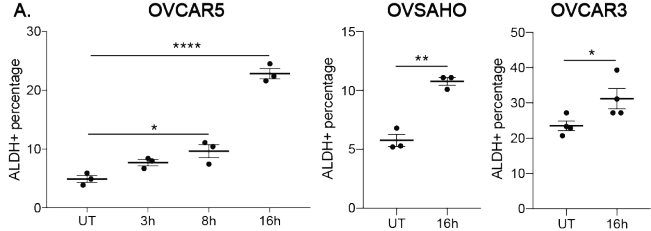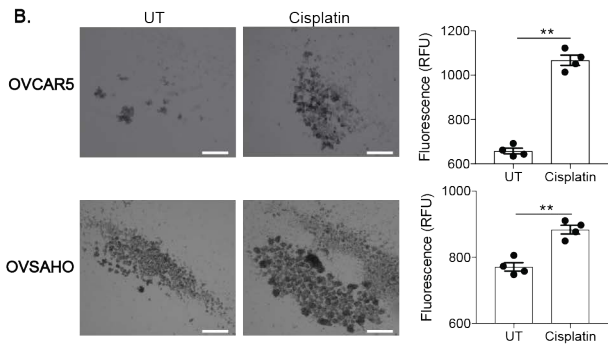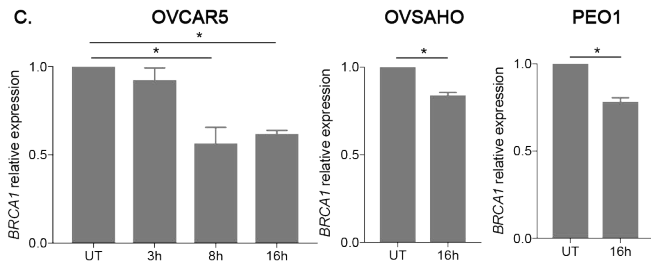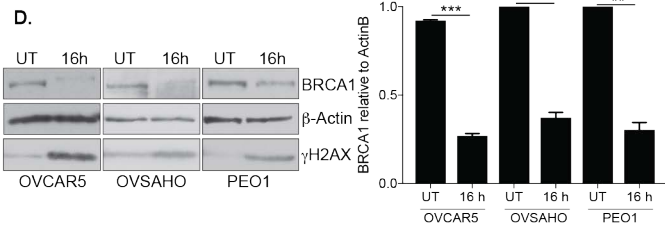

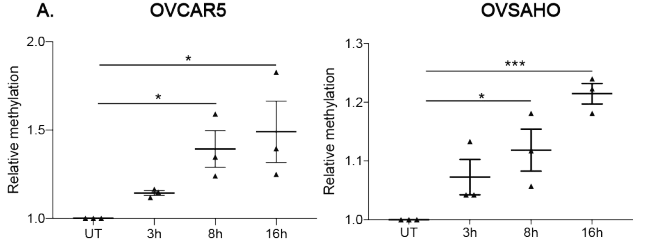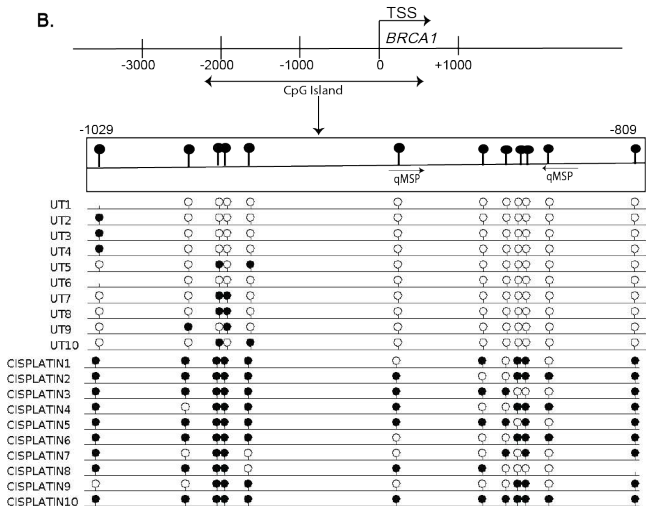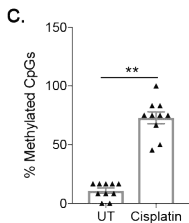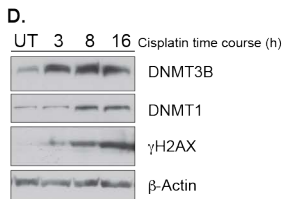

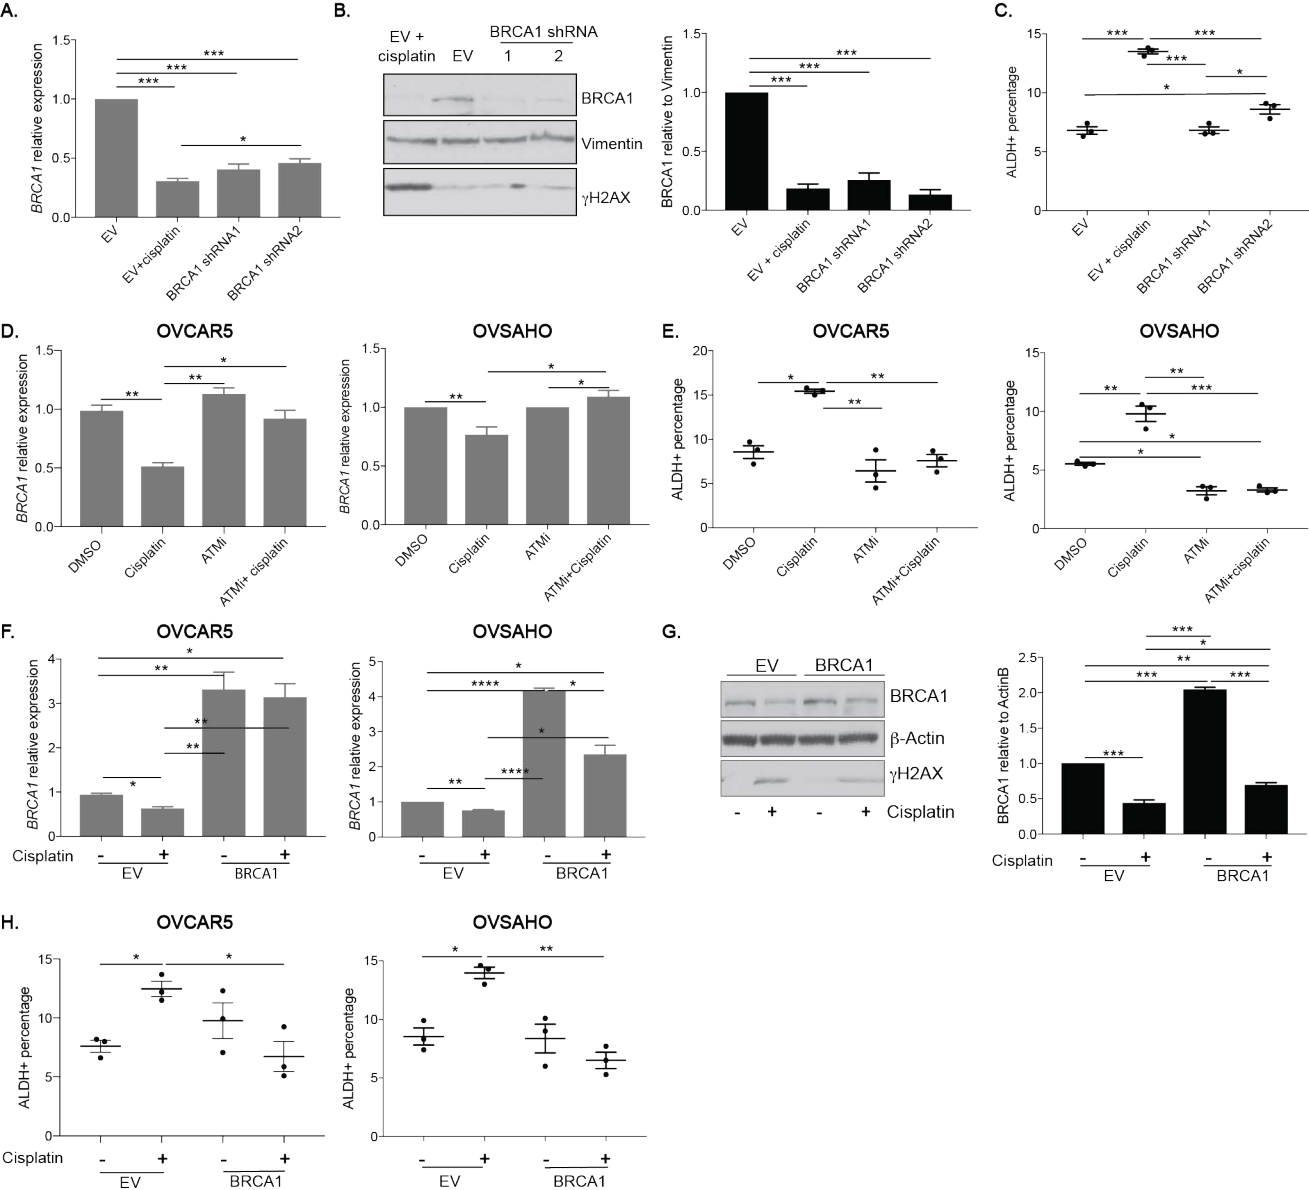

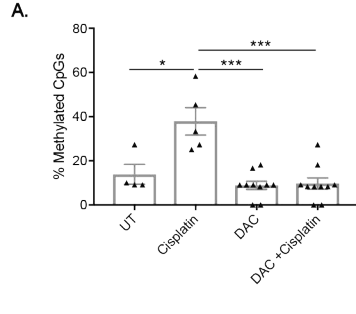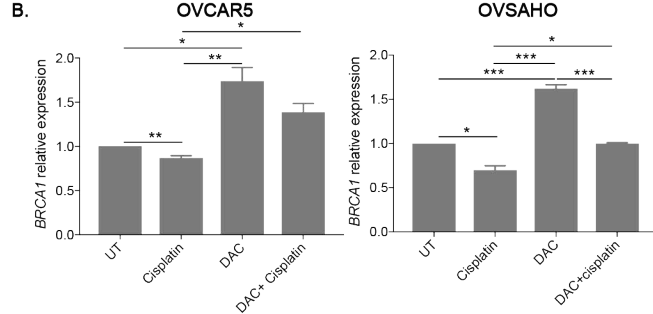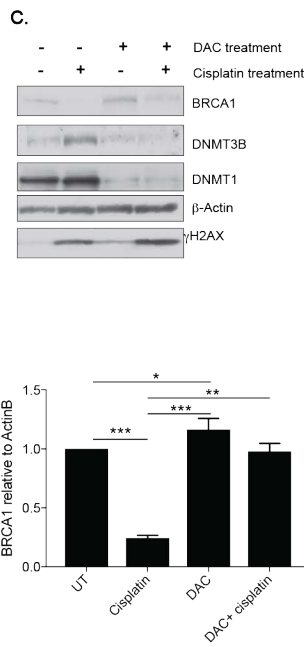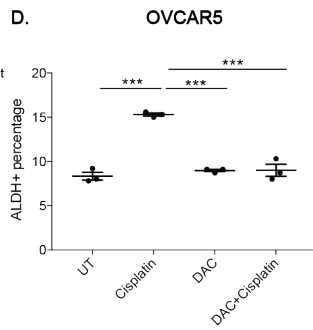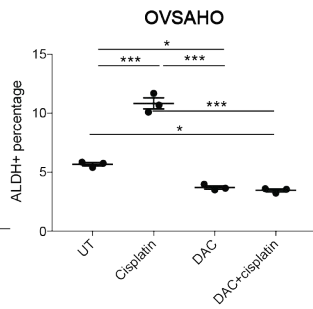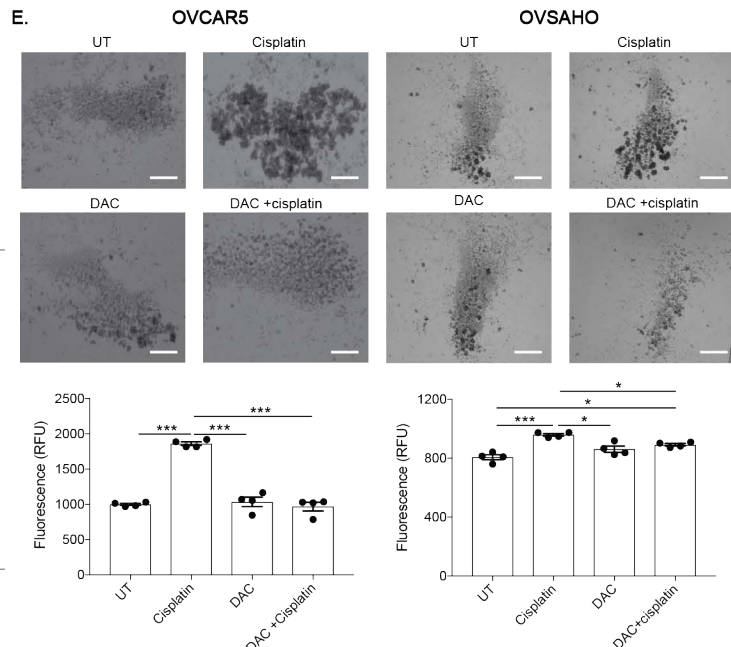

A.

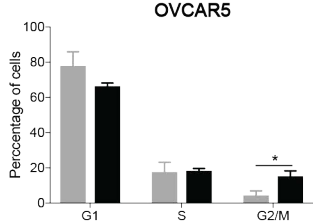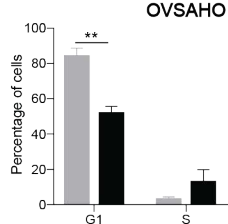

■ ALDH -  
■ ALDH +

B.

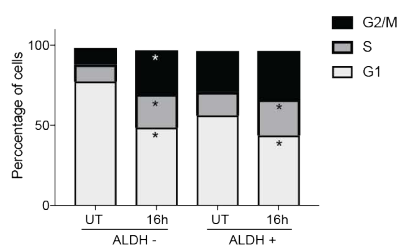

C.

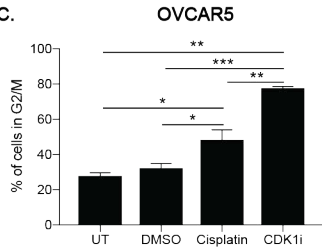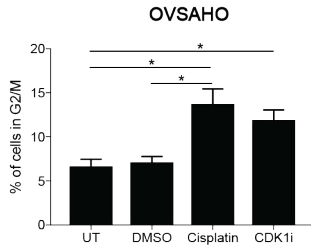

D.

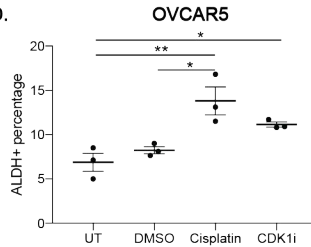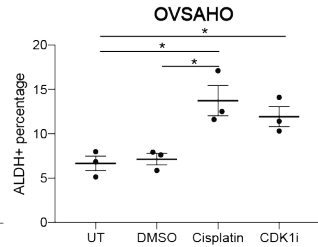

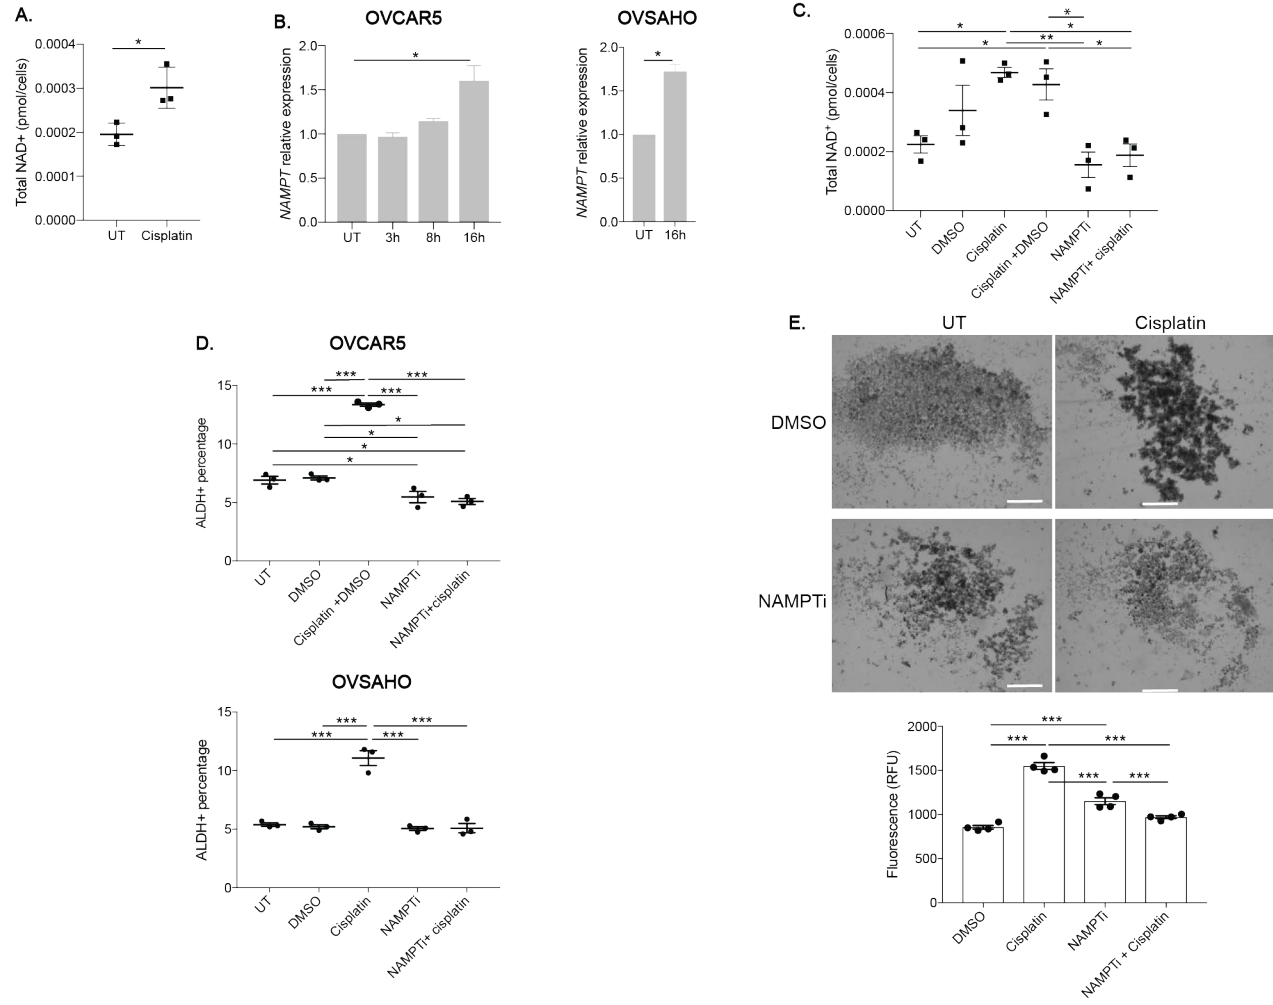

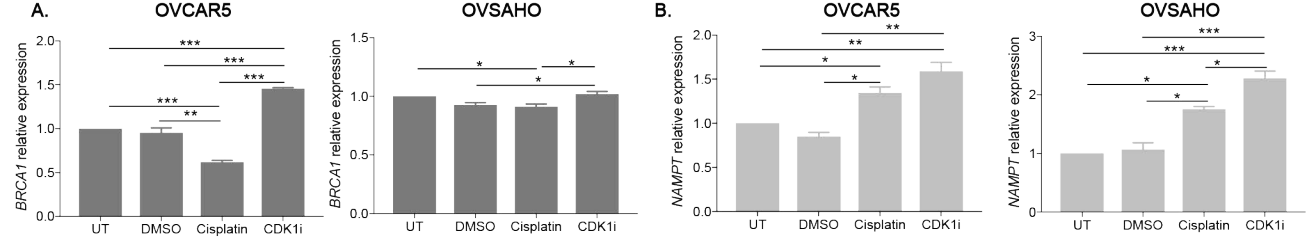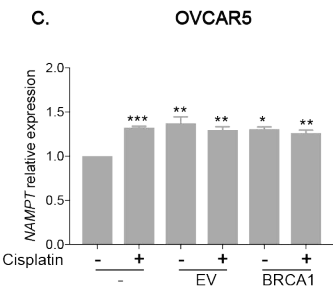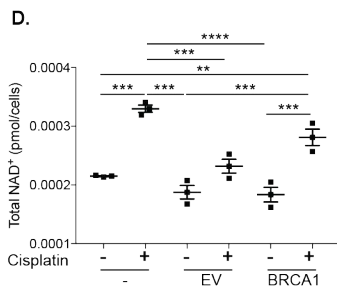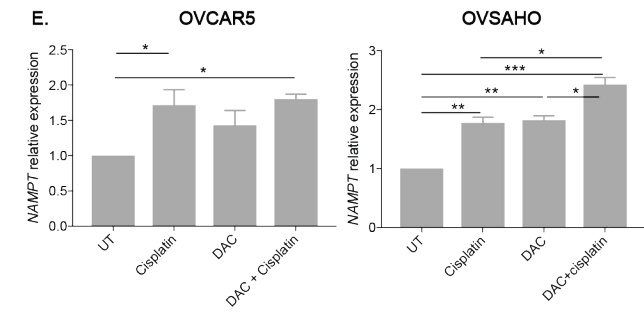



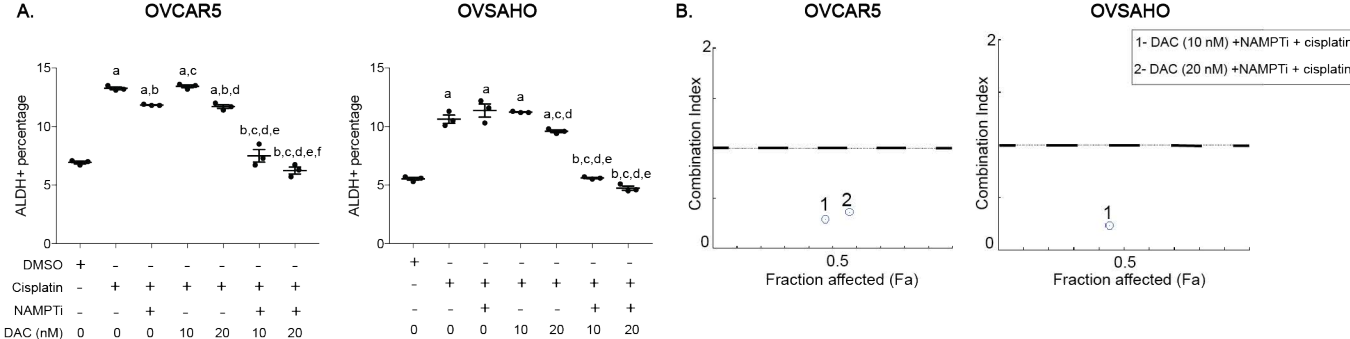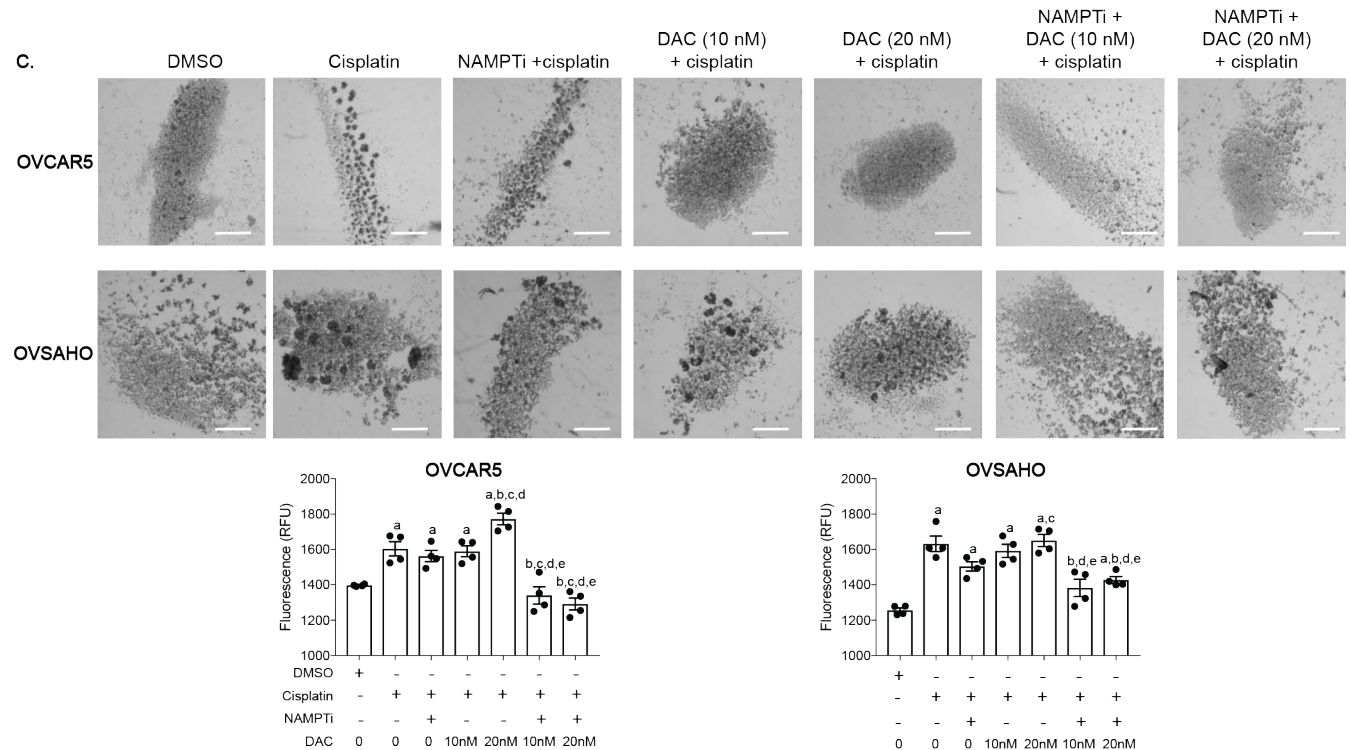

Source: https://www.biorxiv.org/content/10.1101/2021.03.18.435878v1.full.pdf
